# Supplementary material for: Optimization of electron transfer pathways in atomically precise metal nanoclusters: catalyzing a leap in solar water oxidation
Source: Royal Society of Chemistry journal article supplement (doi:10.1039/d5sc08806b), 2025-12-15
Supplement: d5sc08806b1.pdf [file d5sc08806b1.pdf]

## Supporting Information

# Optimization of Electron Transfer Pathways in Atomically Precise Metal Nanoclusters: Catalyzing a Leap in Solar Water Oxidation

Peng Su<sup>a</sup>, Jialiang Liu<sup>a</sup>, Fang-Xing Xiao<sup>a, b\*</sup>

a. College of Materials Science and Engineering, Fuzhou University, New Campus, Minhou, Fujian Province, 350108, China.

b. State Key Laboratory of Structural Chemistry, Fujian Institute of Research on the Structure of Matter, Chinese Academy of Sciences, Fuzhou, Fujian 350002, PR China.

E-mail: fxxiao@fzu.edu.cn

# Table of Contents

## Page NO.

|                                                                                                                                                                |     |
|----------------------------------------------------------------------------------------------------------------------------------------------------------------|-----|
| <b>Experimental section</b> .....                                                                                                                              | S1  |
| <b>Figure S1.</b> Schematic illustration for LbL assembly of TNTA/(PDDA) <sub>1</sub> .....                                                                    | S4  |
| <b>Figure S2.</b> Schematic illustration for LbL assembly of TNTA/(P/MQDs/P/Ag <sub>y</sub> ) <sub>n</sub> (y = x, 9, 16).....                                 | S5  |
| <b>Figure S3.</b> Schematic flowchart for LbL assembly of TNTA/(P/MQDs/P/Ag <sub>y</sub> ) <sub>n</sub> .....                                                  | S6  |
| <b>Figure S4.</b> Molecular structure of PDDA.....                                                                                                             | S7  |
| <b>Figure S5.</b> Zeta potentials of TNTA, MQDs, PDDA, Ag <sub>9</sub> NCs, Ag <sub>16</sub> NCs and Ag <sub>x</sub> NCs.....                                  | S7  |
| <b>Figure S6.</b> Molecular structure of GSH.....                                                                                                              | S8  |
| <b>Figure S7.</b> TEM image and size distribution histogram of the Ag <sub>x</sub> @GSH NCs.....                                                               | S9  |
| <b>Figure S8.</b> TEM image and size distribution histogram of the MQDs.....                                                                                   | S10 |
| <b>Figure S9.</b> FESEM images TNTA/(Ag <sub>x</sub> ) <sub>6</sub> with corresponding EDS and elemental mapping results.....                                  | S11 |
| <b>Figure S10.</b> FESEM images TNTA/(P/MQDs/P/Ag <sub>x</sub> ) <sub>6</sub> with corresponding EDS and elemental mapping results.....                        | S12 |
| <b>Figure S11.</b> XRD results of TNTA, TNTA/(Ag <sub>x</sub> ) <sub>6</sub> and TNTA/(P/MQDs/P/Ag <sub>x</sub> ) <sub>6</sub> .....                           | S13 |
| <b>Figure S12.</b> UV-vis absorption spectra of PDDA, MQDs and Ag <sub>x</sub> @GSH NCs solution.....                                                          | S14 |
| <b>Figure S13.</b> Survey spectra of TNTA, TNTA/(Ag <sub>x</sub> ) <sub>6</sub> and TNTA/(P/MQDs/P/Ag <sub>x</sub> ) <sub>6</sub> .....                        | S15 |
| <b>Figure S14.</b> LSV and I-t of TNTA/(P/MQDs/P/Ag <sub>x</sub> ) <sub>n</sub> .....                                                                          | S16 |
| <b>Figure S15.</b> I-t results, LSV, ABPE and EIS results of TNTA, TNTA/(PDDA) <sub>6</sub> and TNTA/(MQDs) <sub>6</sub> .....                                 | S17 |
| <b>Figure S16.</b> Schematic diagram depicting the mechanism of Ag <sub>y</sub> NCs to Ag NPs.....                                                             | S18 |
| <b>Figure S17.</b> Anodic transient dynamics of TNTA/(Ag <sub>x</sub> ) <sub>6</sub> and TNTA/(P/MQDs/P/Ag <sub>x</sub> ) <sub>6</sub> (under λ > 420 nm)..... | S19 |
| <b>Figure S18.</b> CV plots and ESCA results of TNTA, TNTA/(Ag <sub>x</sub> ) <sub>6</sub> and TNTA/(P/MQDs/P/Ag <sub>x</sub> ) <sub>6</sub> .....             | S20 |
| <b>Figure S19.</b> TEM and size distribution of Ag <sub>9</sub> @(GSH) <sub>6</sub> NCs and Ag <sub>16</sub> @(GSH) <sub>9</sub> NCs.....                      | S21 |
| <b>Figure S20.</b> SEM images of TNTA/(P/MQDs/P/Ag <sub>9</sub> ) <sub>6</sub> and TNTA/(P/MQDs/P/Ag <sub>16</sub> ) <sub>6</sub> .....                        | S22 |
| <b>Figure S21.</b> Water splitting performances of TNTA/(P/MQDs/P/Ag <sub>x</sub> ) <sub>6</sub> (under AM 1.5G).....                                          | S23 |
| <b>Figure S22.</b> Schematic diagram of in situ irradiated high-resolution spectra.....                                                                        | S24 |
| <b>Figure S23.</b> Energy band characterization of TiO <sub>2</sub> .....                                                                                      | S25 |
| <b>Figure S24.</b> Energy band characterization of Ag <sub>x</sub> @GSH NCs.....                                                                               | S26 |
| <b>Figure S25.</b> Energy band characterization of Ag <sub>9</sub> @(GSH) <sub>6</sub> NCs.....                                                                | S27 |
| <b>Figure S26.</b> Energy band characterization of Ag <sub>16</sub> @(GSH) <sub>9</sub> NCs.....                                                               | S28 |
| <b>Figure S27.</b> Schematic Illustration of the PEC Water Oxidation Mechanism.....                                                                            | S29 |
| <b>Table S1.</b> Peak position with corresponding functional groups for all photoanodes.....                                                                   | S30 |
| <b>Table S2.</b> Chemical bond species for different photoelectrodes.....                                                                                      | S31 |
| <b>Table S3.</b> Fitted EIS results of photoanodes under visible-light irradiation based on the equivalent circuit.....                                        | S32 |
| <b>Table S4.</b> Comparison of photocurrent density for this work with reported TiO <sub>2</sub> -based PEC water splitting.....                               | S33 |
| <b>Table S5.</b> Fitted parameters for time-resolved PL decay spectra of different samples.....                                                                | S34 |
| <b>Reference</b> .....                                                                                                                                         | S35 |

## Experimental section

### 1. Materials

Titanium sheet (99.99%, 0.1×20×50 mm), Graphite sheet (99.6%), Deionized water (DI H<sub>2</sub>O, Millipore, 18.2 MΩ cm resistivity), Ethylene glycol (C<sub>2</sub>H<sub>6</sub>O<sub>2</sub>), Ammonia fluoride (NH<sub>4</sub>F), Hydrogen fluoride (HF), Nitric acid (HNO<sub>3</sub>), Sodium hydroxide (NaOH), Sodium sulfate (Na<sub>2</sub>SO<sub>4</sub>), hydrochloric acid (HCl), ammonium oxalate ((NH<sub>4</sub>)<sub>2</sub>C<sub>2</sub>O<sub>4</sub>), Sodium borohydride (NaBH<sub>4</sub>), Silver nitrate (AgNO<sub>3</sub>), gold (III) chloride trihydrate (HAuCl<sub>4</sub>·3H<sub>2</sub>O) were obtained from Sinopharm Chemical Reagent Co., Ltd (Shanghai, China). Lglutathione (GSH) and poly(diallyl-dimethyl-ammonium chloride) solution (PDDA, average Mw 200.000-350.000) were obtained from Sigma-Aldrich. All reagents above were used as received without further purification.

### 2. Preparation of TNTA<sup>[1]</sup>

A secondary electrochemical anodization method was employed to prepare TiO<sub>2</sub> nanoarrays. Ti foil was first thoroughly sonicated in acetone, ethanol and DI H<sub>2</sub>O for 15 min, respectively. Then, Ti sheets were immersed in a mixed solution of HF-HNO<sub>3</sub>-H<sub>2</sub>O with volume ratio of 1: 4: 5 for 20 s, washed by DI H<sub>2</sub>O and dried with a gentle N<sub>2</sub> stream. Anodization was carried out under ambient conditions at 50 V for 2 h with ca. 3 cm separation distance between the working (Ti foil) and counter electrode (graphite). The electrolyte consists of 0.3 wt. % of NH<sub>4</sub>F (0.6 g) in ethylene glycol (196 mL) and DI H<sub>2</sub>O (4 mL). After the first-step anodization, the as-obtained TiO<sub>2</sub> layer was removed from Ti foil by sonication in ethanol for 5 min, washed by DI H<sub>2</sub>O and dried with a N<sub>2</sub> stream. The second anodization was performed at 50 V for 30 min to produce the TNTAs. Similarly, the resulting TNTAs were also washed by DI H<sub>2</sub>O, dried with a N<sub>2</sub> stream and finally calcined at 450°C for 3 h in air with a heating rate of 5 °C min<sup>-1</sup>.

### 3. Preparation of Ag<sub>x</sub>@GSH nanoclusters (Ag<sub>x</sub> NCs)<sup>[2]</sup>

In brief, 12.5 mL of 20 mM AgNO<sub>3</sub> and 7.5 mL of 50 mM reduced glutathione (GSH) were added to a

500 mL flask containing 200 mL of deionized water. White precipitates appeared instantly as a result of the formation of  $\text{Ag}_x\text{@GSH}$  complexes, and this mixture was stirred for 2 min. The precipitates dissolved completely when the pH of the reaction mixture was changed to 11 by adding a 1 M NaOH solution, forming a transparent solution. Heating this solution at 90 °C (inside of solution) for 1 h under stirring at 500 rpm yielded initial products of  $\text{Ag}_x\text{@GSH}$ , whose differences were evident from the color change of the transparent solution to light orange. After the solution was naturally cooled to room temperature, the pH was changed again to 3.75 by adding 1 M HCl. This abrupt pH change resulted in an instantaneous darkening of the solution color that signified the aggregation of Ag thiolate complexes on the surface of the Ag core. The color of the NC solution became darker over time. Hence, the NC solution was aged for 24 h at room temperature to complete this process, and no further change in the color was observed after 24 h. Any precipitates formed during this period were removed via centrifugation. The  $\text{Ag}_x\text{@GSH}$  nanoclusters were collected without purification and stored at 4 °C for further characterization.

#### **4. Preparation of $\text{Ag}_{16}(\text{GSH})_9$ and $\text{Ag}_9(\text{GSH})_6$ NCs<sup>[2]</sup>**

Aqueous solutions of  $\text{AgNO}_3$  (20 mM) and GSH (50 mM) were prepared with ultrapure water. An aqueous solution of  $\text{NaBH}_4$  (112 mM) was freshly prepared by dissolving 43 mg of  $\text{NaBH}_4$  in 2 mL of 1 M NaOH solution, followed by the addition of 8 mL of DI water. The addition of a certain amount of NaOH to the  $\text{NaBH}_4$  solution was used to improve the stability of borohydride ions against hydrolysis. In a typical experiment to synthesize  $\text{Ag}_{16}(\text{GSH})_9$  and  $\text{Ag}_9(\text{GSH})_6$  NCs, aqueous solutions of  $\text{AgNO}_3$  (125  $\mu\text{L}$ , 20 mM) and GSH (150  $\mu\text{L}$ , 50 mM) were first mixed in water (4.85 mL) S3 under vigorous stirring to form thiolate-Ag complexes, followed by the addition of an aqueous solution of  $\text{NaBH}_4$  (50  $\mu\text{L}$ , 112 mM). A deep-red solution of Ag NCs (~5mL) was collected after 5 min. This Ag NC solution was then incubated at room temperature for 3h, and the deep-red solution gradually decomposed into a colorless solution, leading to the formation of thiolate-Ag complexes. Subsequently, a certain amount of 112 mM  $\text{NaBH}_4$  [50  $\mu\text{L}$  for the

synthesis of  $\text{Ag}_{16}(\text{GSH})_9$  or 250  $\mu\text{L}$  for  $\text{Ag}_9(\text{GSH})_6$  NCs] was introduced into this colorless solution under vigorous stirring, leading to the formation of a light-brown Ag NC solution after 15 min. Without stirring, this light-brown Ag NC solution was incubated at room temperature for a certain period of time [8 h for  $\text{Ag}_{16}(\text{GSH})_9$  and 48 h for  $\text{Ag}_9(\text{GSH})_6$  NCs]. A strong red or green emission was then observed in the aqueous phase. The  $\text{Ag}_{16}(\text{GSH})_9$  NCs ( $\text{Ag}_{16}$  NCs) or  $\text{Ag}_9(\text{GSH})_6$  NCs ( $\text{Ag}_{16}$  NCs) were collected without purification and stored at 4 °C for further characterization.

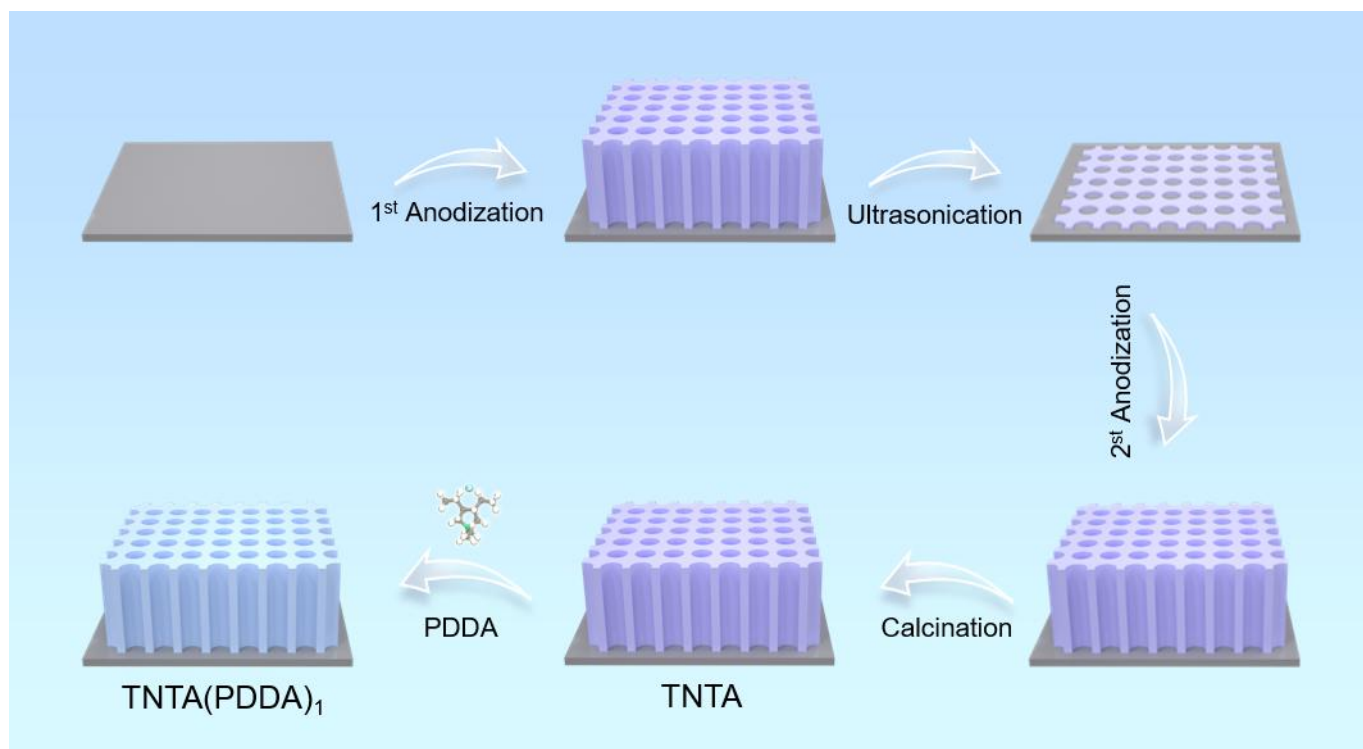

**Figure S1.** Schematic illustration for LbL assembly of TNTA/(PDDA)<sub>1</sub> multilayered heterostructure.

**Note:** TiO<sub>2</sub> nanotube array (TNTA) were fabricated using a two-step anodization method. Compared with single-step anodization, the core advantage of the two-step anodization method lies in its "sacrificial first, perfect later" preparation strategy. Specifically, the nanotube arrays generated in the first anodization process usually have poor orderliness. Subsequently, the TiO<sub>2</sub> layer is completely removed in ethanol by ultrasonication, thereby forming a porous oxide layer template with a certain degree of orderliness on the surface of the titanium sheet. Since this template provides a highly ordered pit structure, the second oxidation can be directly initiated at uniform and regular nucleation points, bypassing the random nucleation stage, and ultimately growing highly ordered and uniform TNTA.

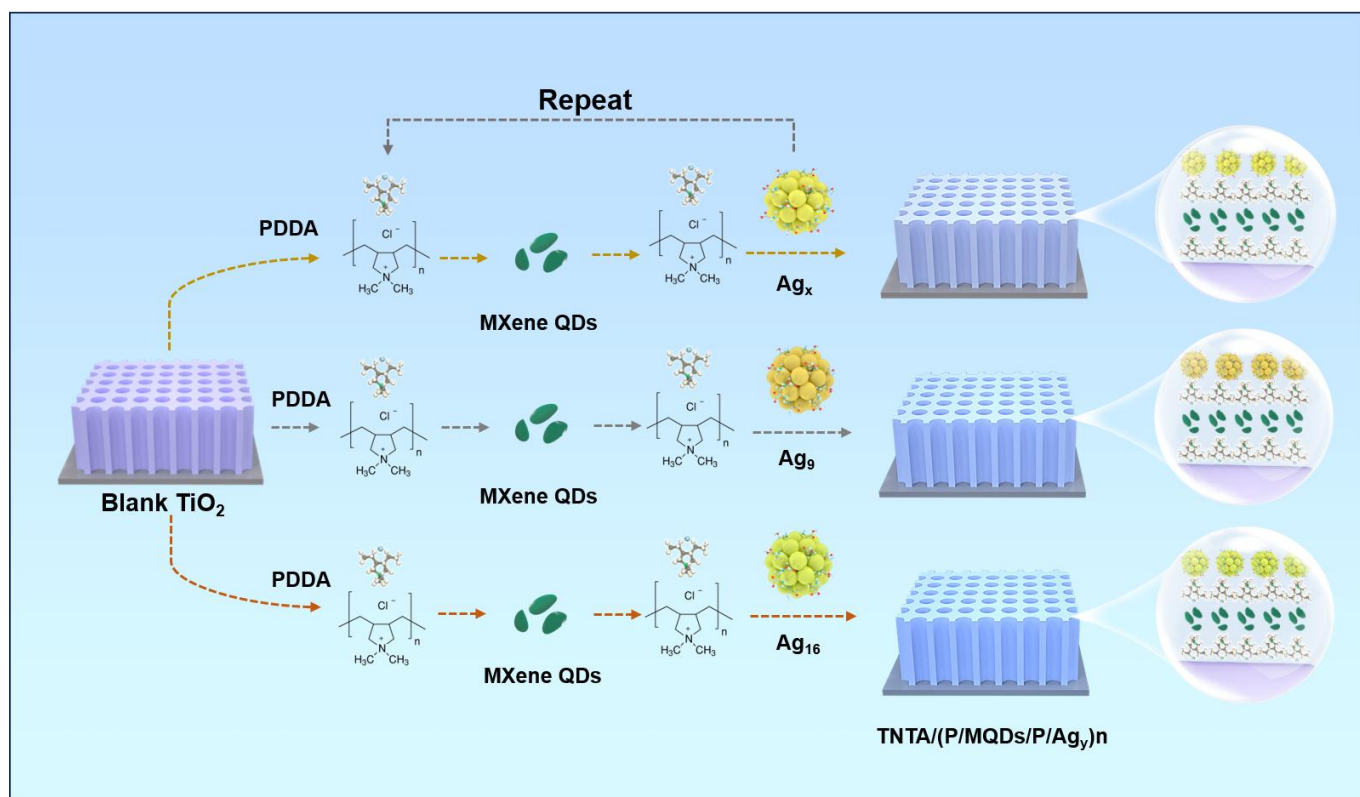

**Figure S2.** Schematic illustration for LbL assembly of TNTA/(P/MQDs/P/Ag<sub>y</sub>)<sub>n</sub> ( $y = x, 9, 16$ ) multilayered heterostructures.

**Note:** Through the layer-by-layer self-assembly technique, using positively charged PDDA, negatively charged MQDs, and negatively charged Ag<sub>x</sub>@GSH as basic functional units, we have successfully constructed a structurally ordered multilayer heterojunction on the TNTA substrate. Moreover, this method demonstrates good versatility. Ag<sub>x</sub>@GSH nanocrystals can be replaced by other silver nanoclusters (Ag<sub>9</sub>(GSH)<sub>6</sub>, Ag<sub>16</sub>(GSH)<sub>9</sub>), providing convenience for systematic studies on the effects of different components on the performance of photoanodes.

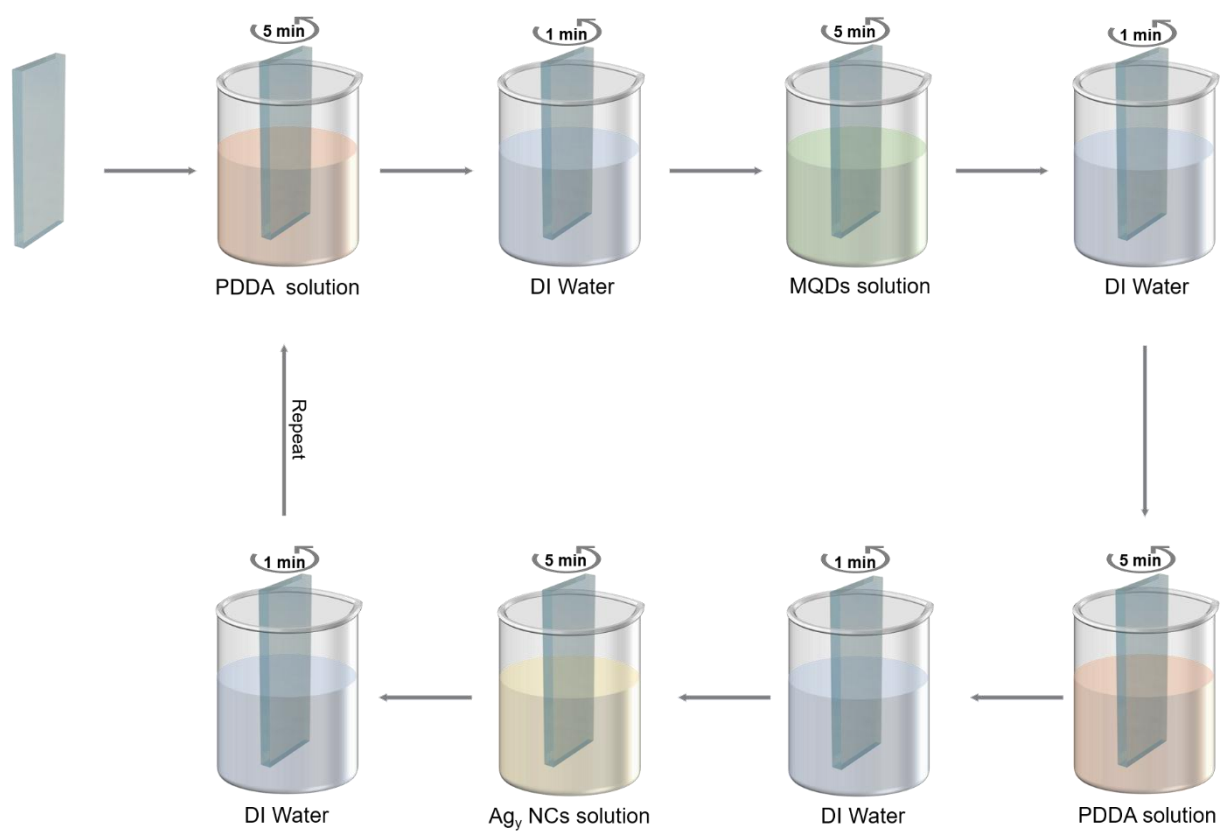

**Figure S3.** Schematic flowchart for LbL assembly of TNTA/(P/MQDs/P/Ag<sub>y</sub>)<sub>n</sub>.



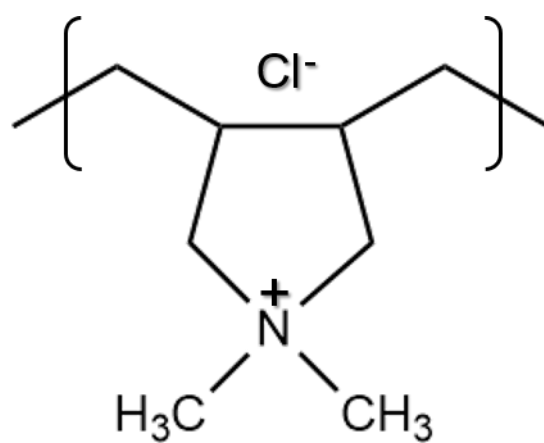

**Figure S4.** Molecular structure of PDDA.

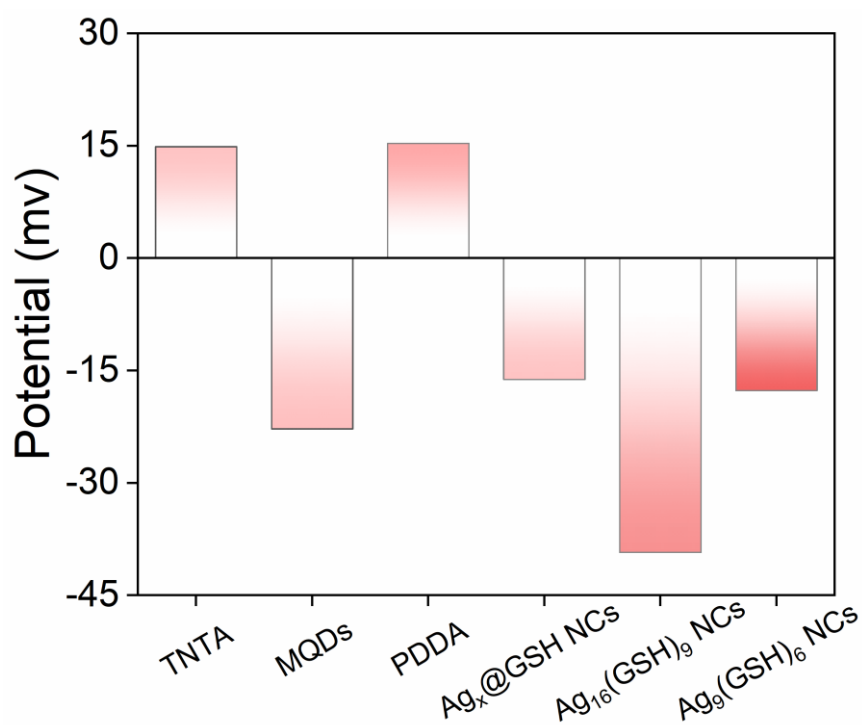

**Figure S5.** Zeta potentials of TNTA, MQDs, PDDA, Ag<sub>x</sub>@GSH NCs, Ag<sub>9</sub>(GSH)<sub>6</sub> NCs and Ag<sub>16</sub>(GSH)<sub>9</sub> NCs.

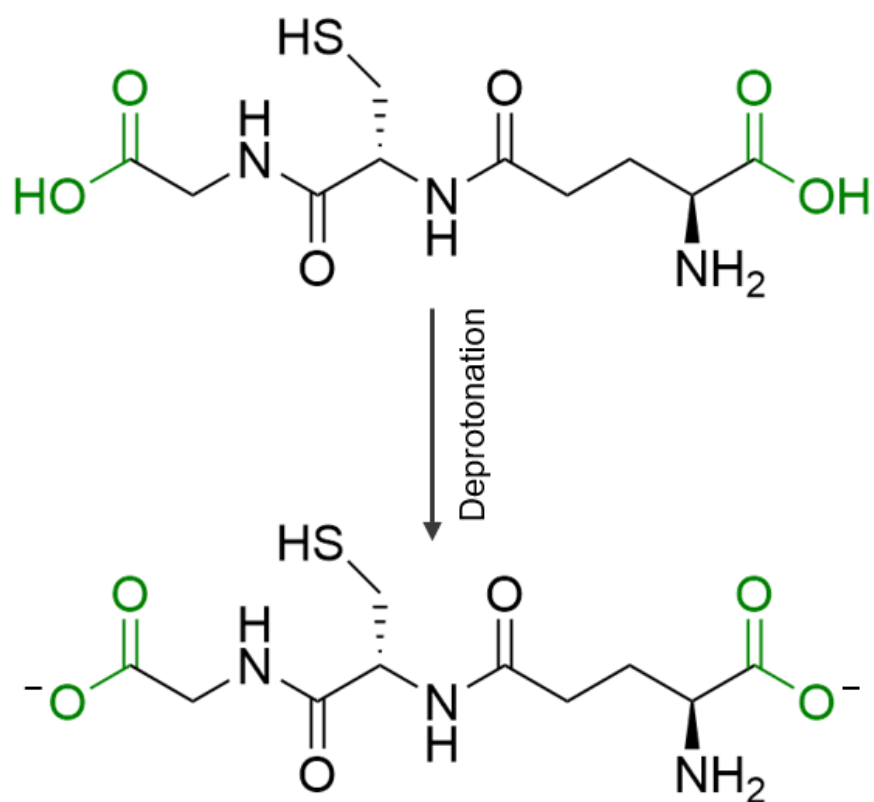

**Figure S6.** Molecular structure of GSH ligand along with deprotonation process.

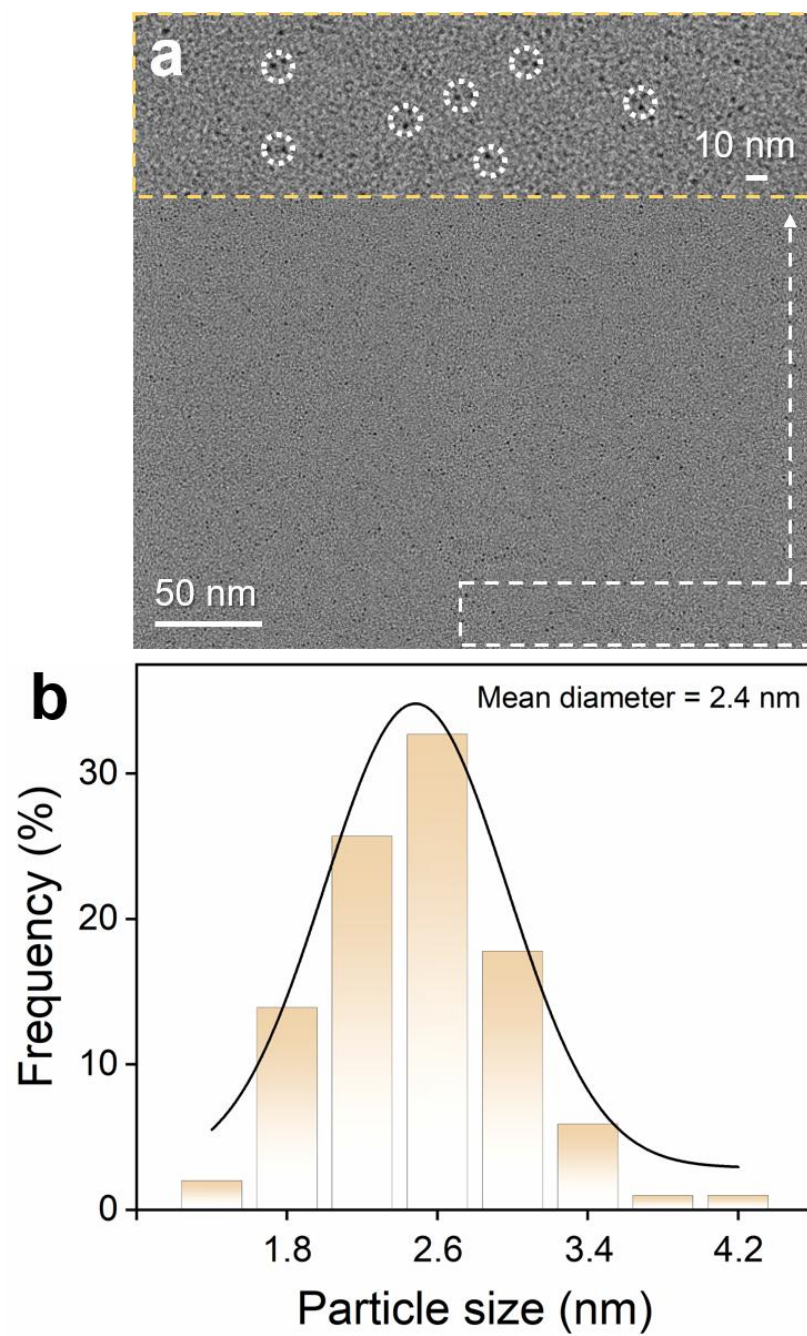

**Figure S7.** (a) TEM image and (b) size distribution histogram of  $\text{Ag}_x\text{@GSH}$  NCs.

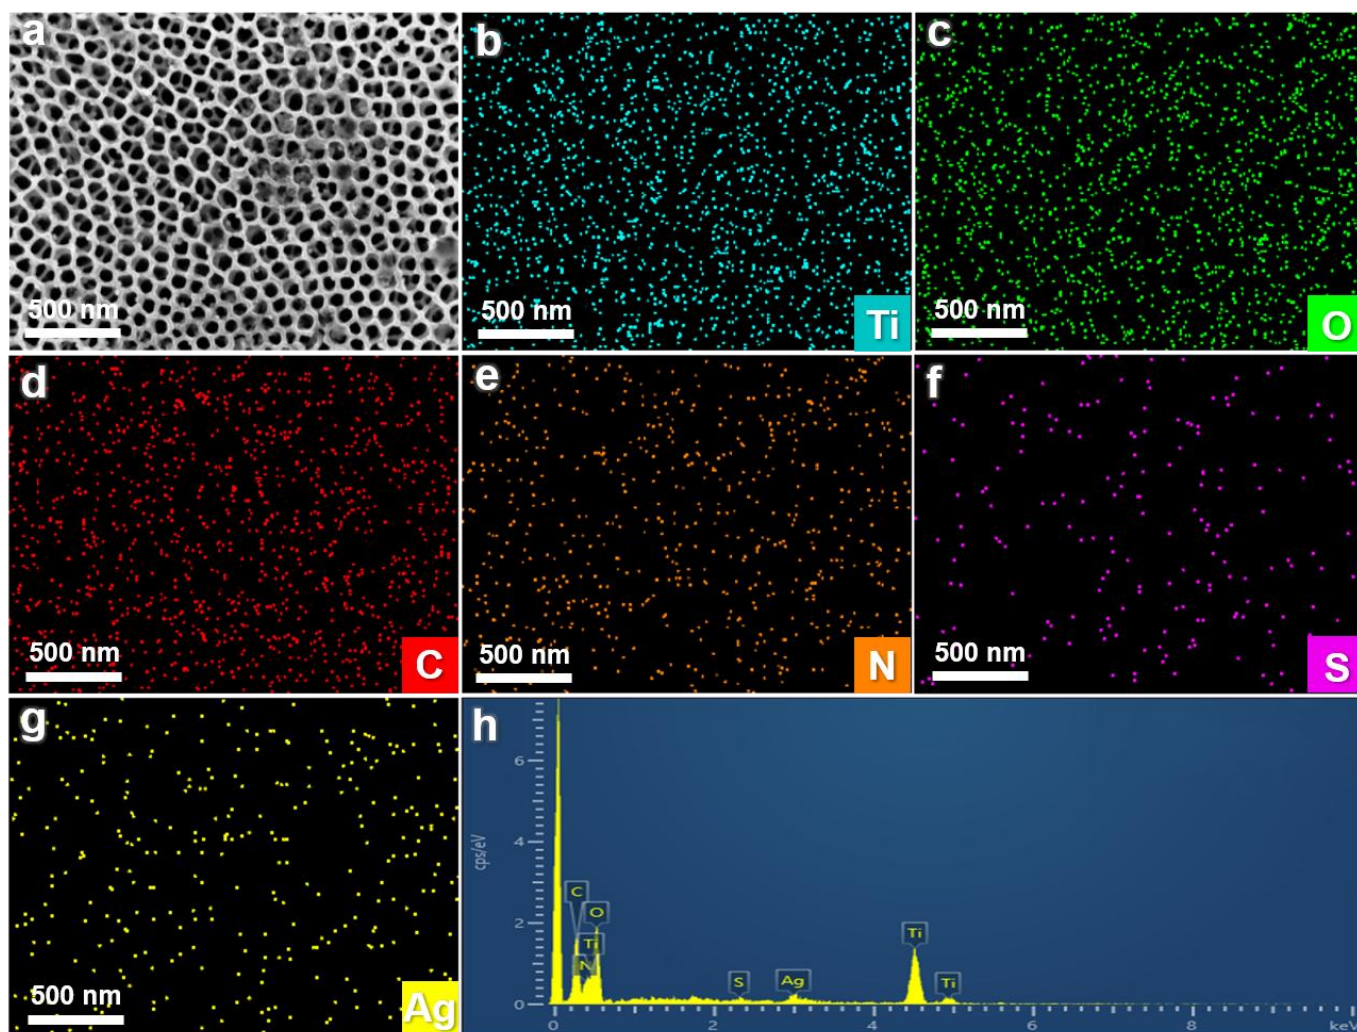

**Figure S8.** (a) Top-view SEM image of TNTA/(Ag<sub>x</sub>)<sub>6</sub> with (b-g) elemental mapping and (h) EDS results.

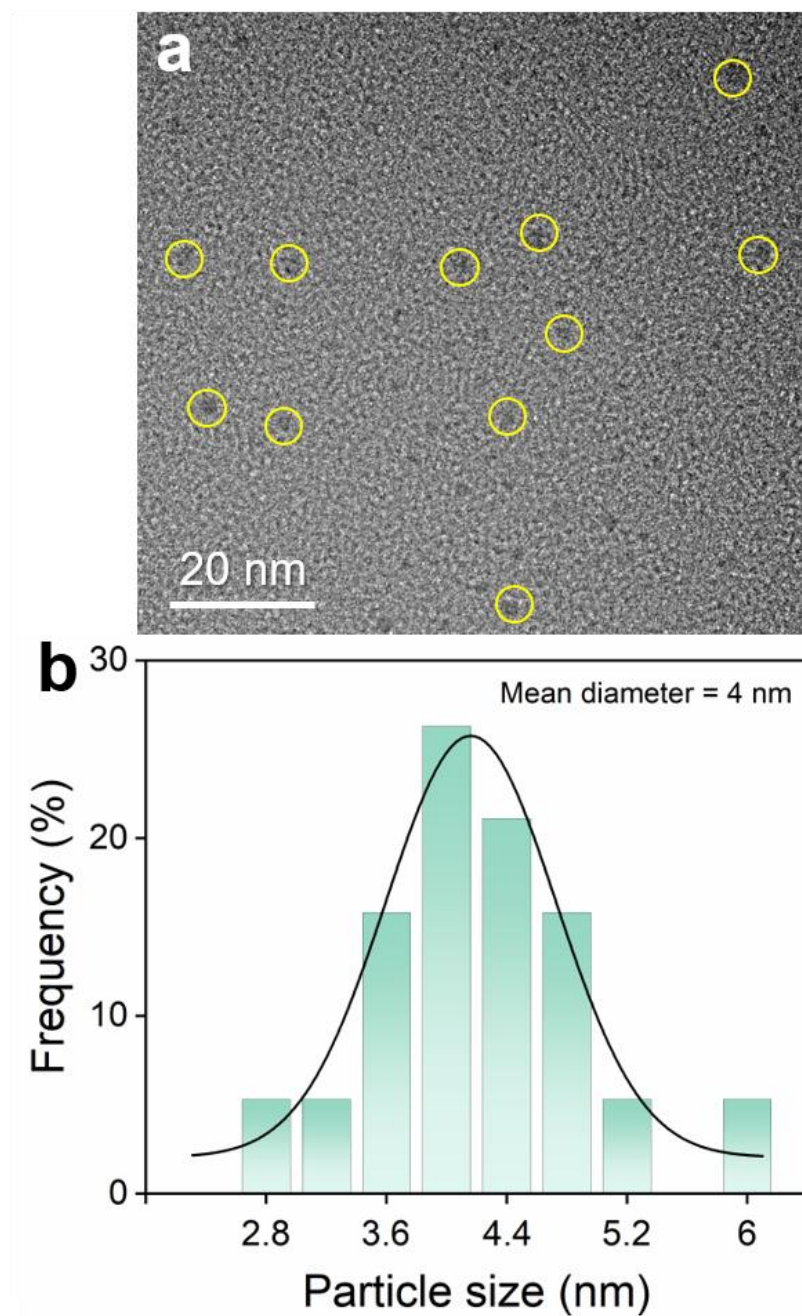

**Figure S9.** (a) TEM image and (b) size distribution histogram of MQDs.



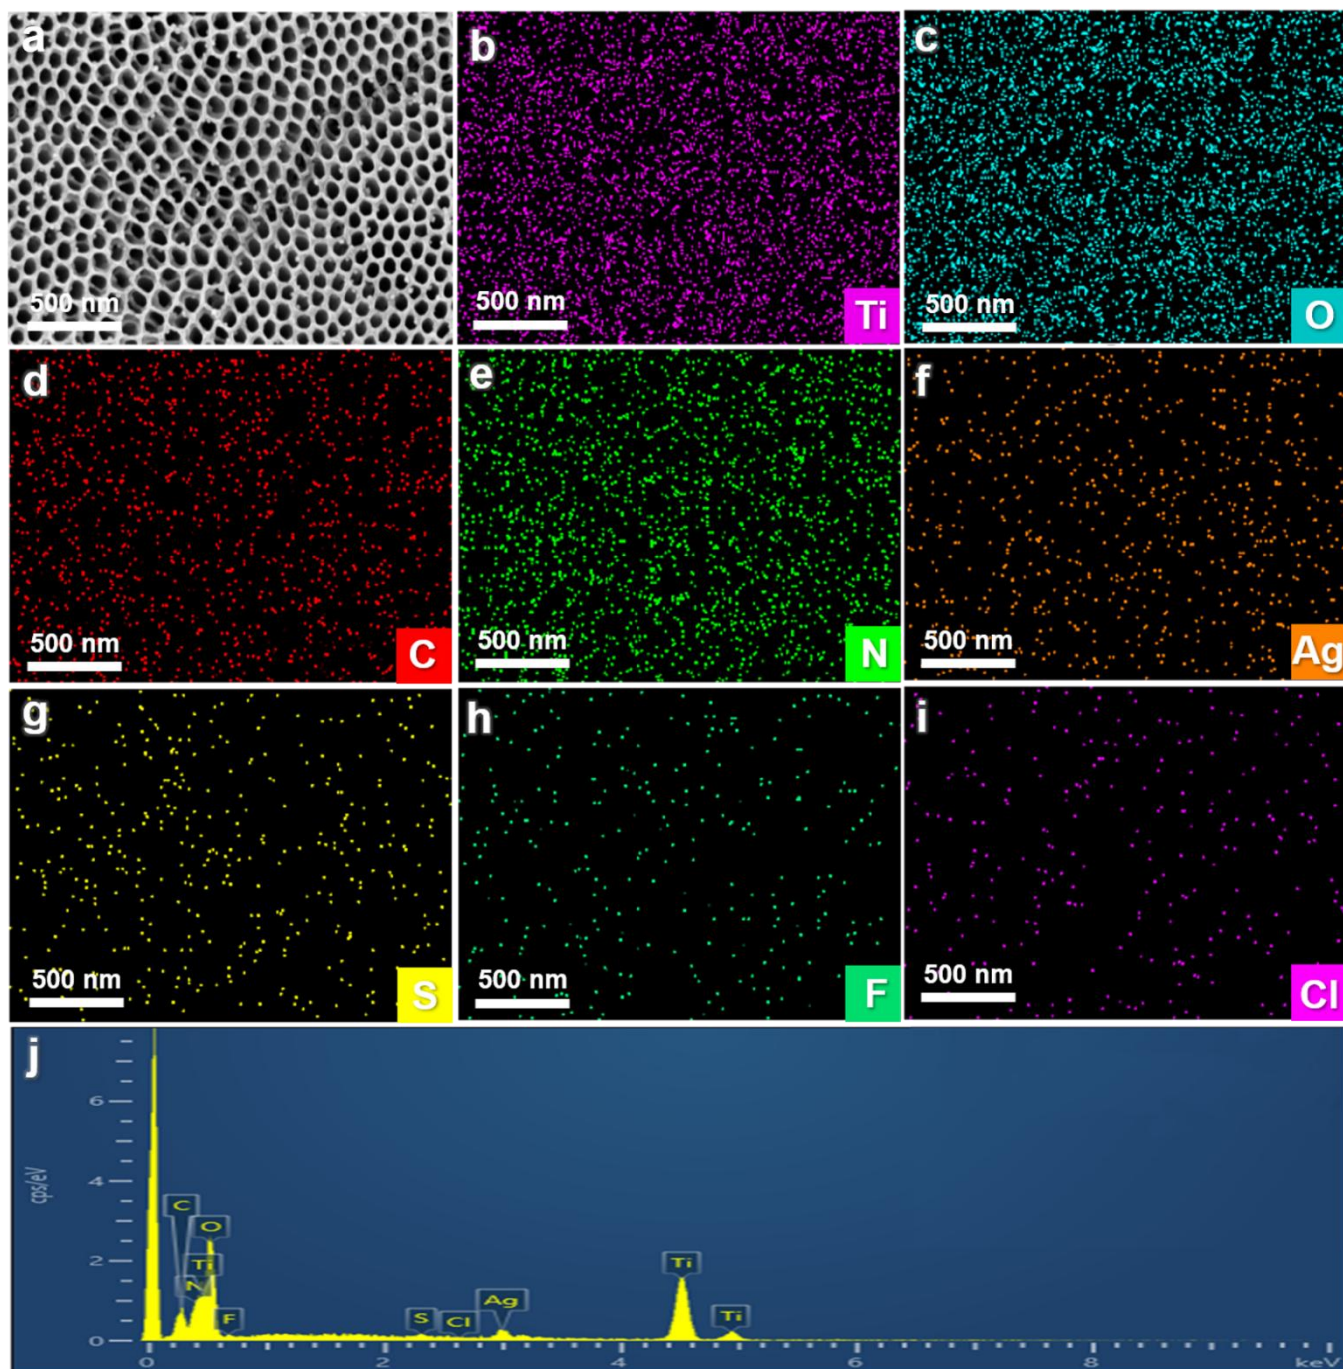

**Figure S10.** (a) Top-view SEM image of TNTA/(P/MQDs/P/Ag<sub>x</sub>)<sub>6</sub> with (b-i) elemental mapping and (j) EDS results.

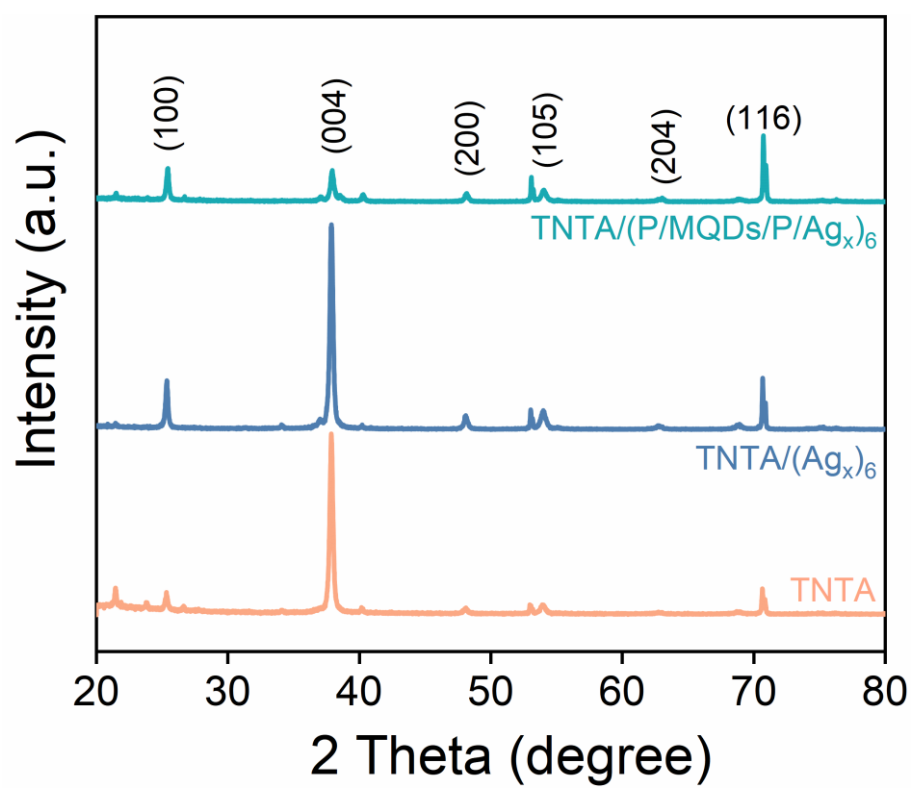

**Figure S11.** XRD results of TNTA,  $\text{TNTA}/(\text{Ag}_x)_6$  and  $\text{TNTA}/(\text{P}/\text{MQDs}/\text{P}/\text{Ag}_x)_6$ .

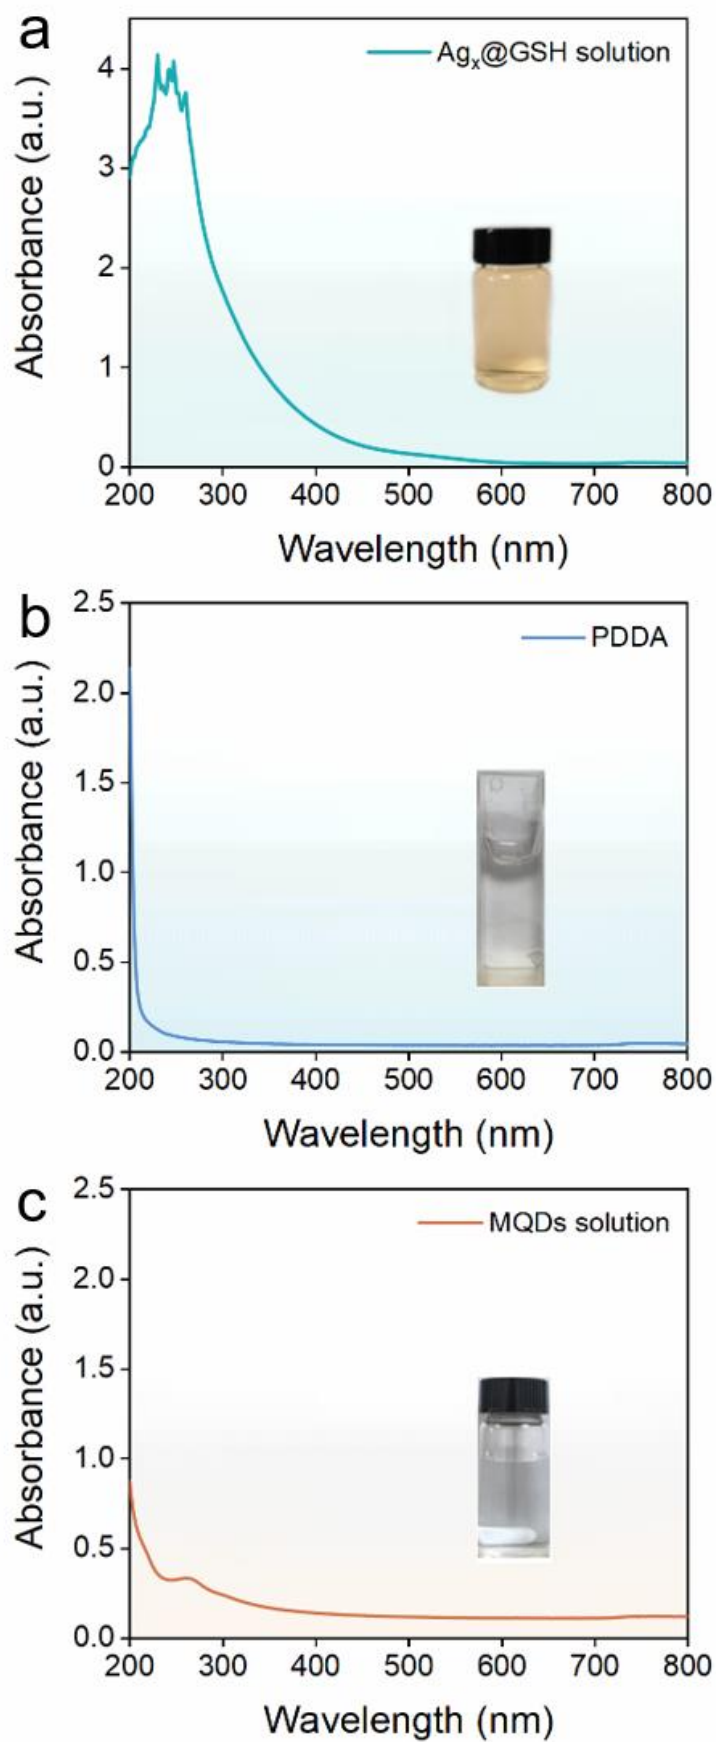

**Figure S12.** UV-vis absorption spectra of (a) Ag<sub>x</sub>@GSH NCs, (b) PDDA and (c) MQDs solution.



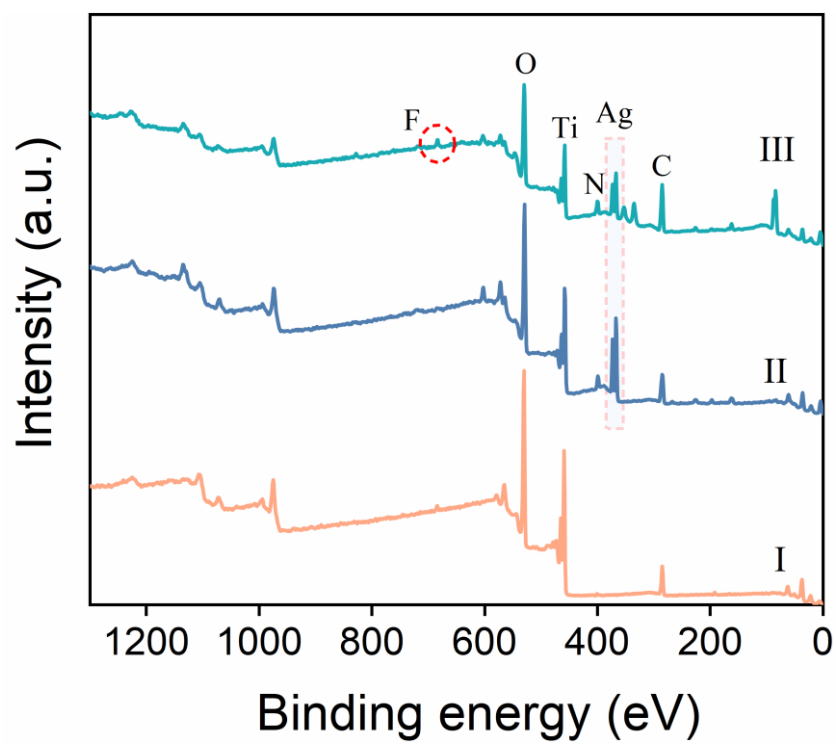

**Figure S13.** Survey spectra of (I) TNTA, (II) TNTA/(Ag<sub>x</sub>)<sub>6</sub> and (III) TNTA/(P/MQDs/P/Ag<sub>x</sub>)<sub>6</sub>.

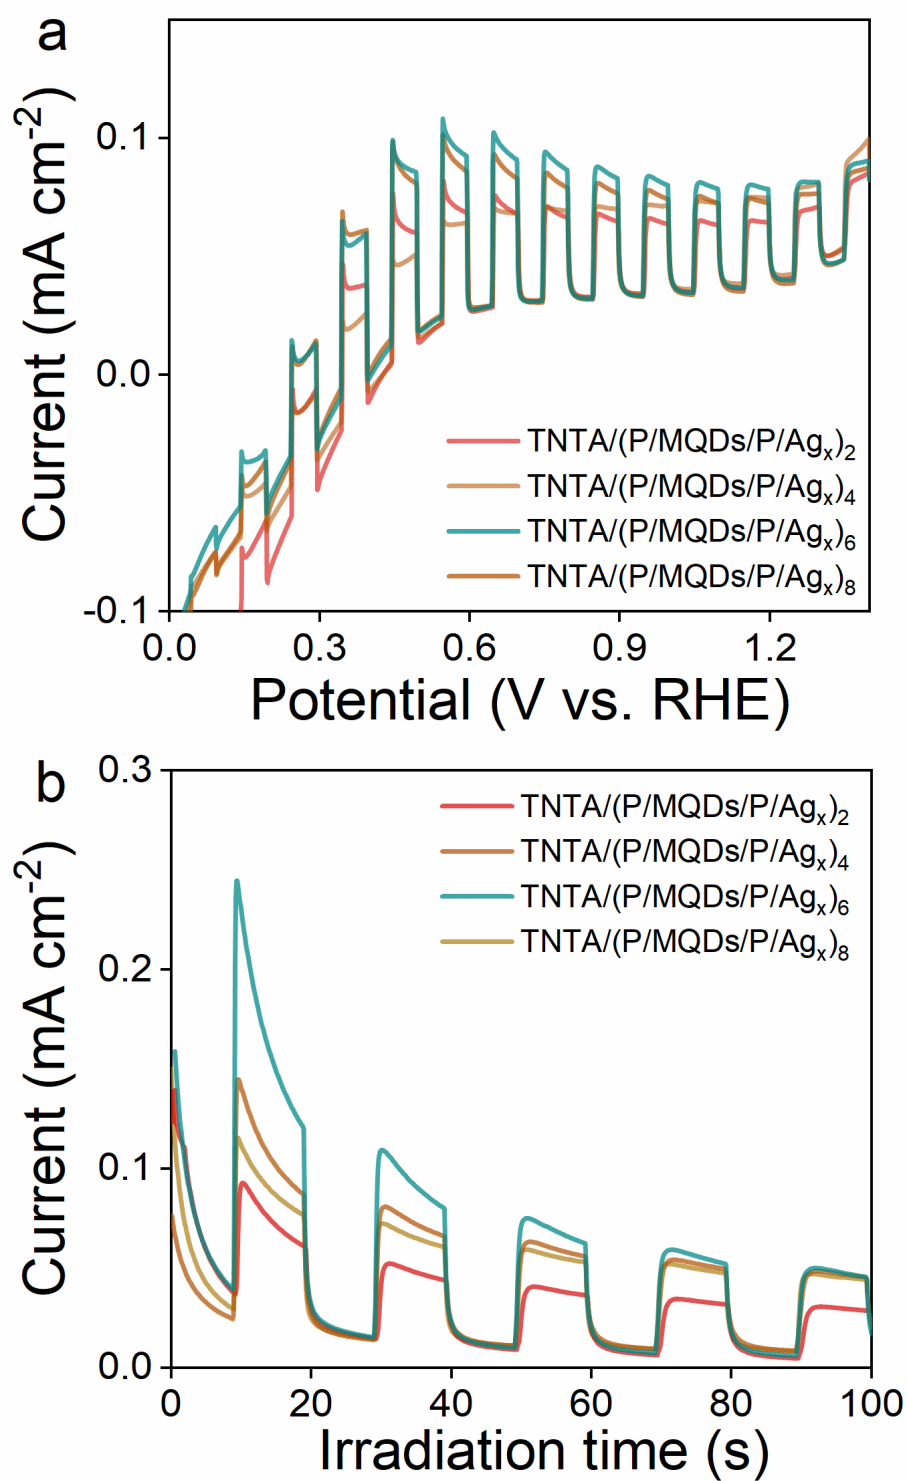

**Figure S14.** (a) LSV results and (b) I-t responses of TNTA/(P/MQDs/P/Ag<sub>x</sub>)<sub>n</sub> (n = 2, 4, 6, 8).

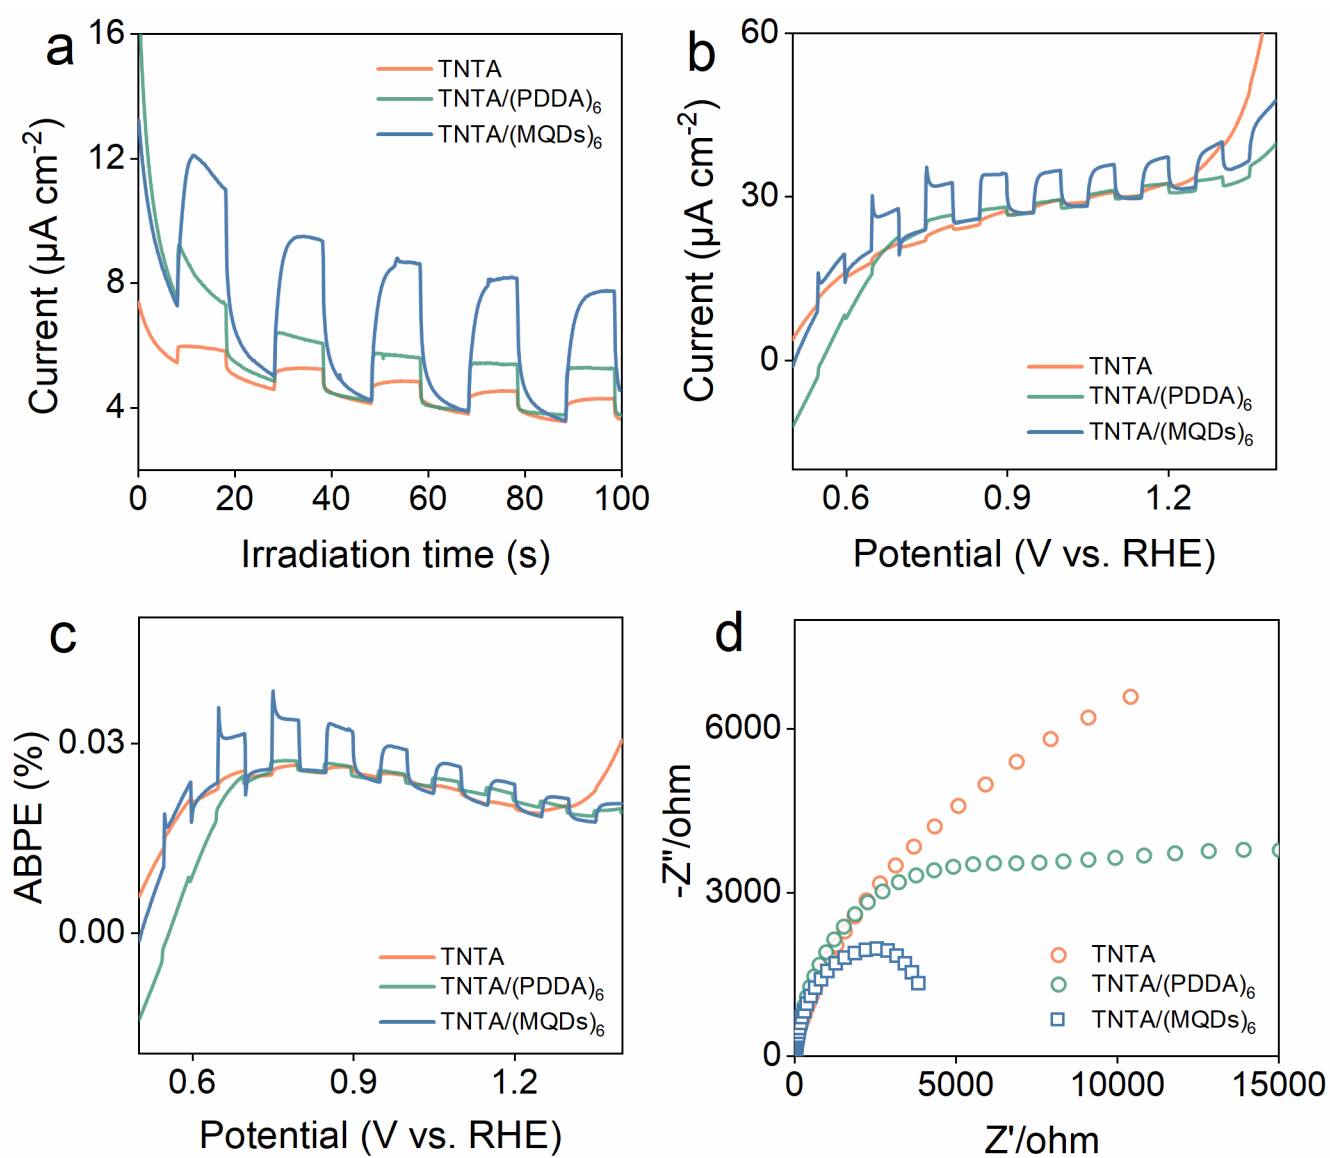

**Figure S15.** (a) I-t results (bias: 1.23 V vs. RHE, 0-100 s), (b) LSV, (c) ABPE and (d) EIS results of TNTA, TNTA/(PDDA)<sub>6</sub> and TNTA/(MQDs)<sub>6</sub>.

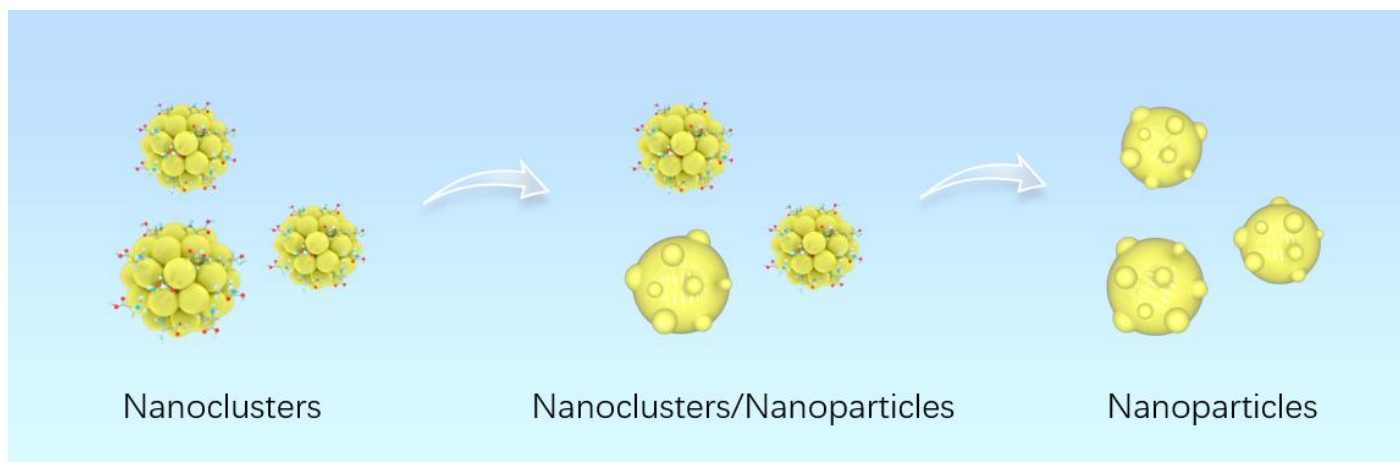

**Figure S16.** Schematic diagram depicting the mechanism for in-situ self-transformation of Ag<sub>y</sub> NCs to Ag NPs.

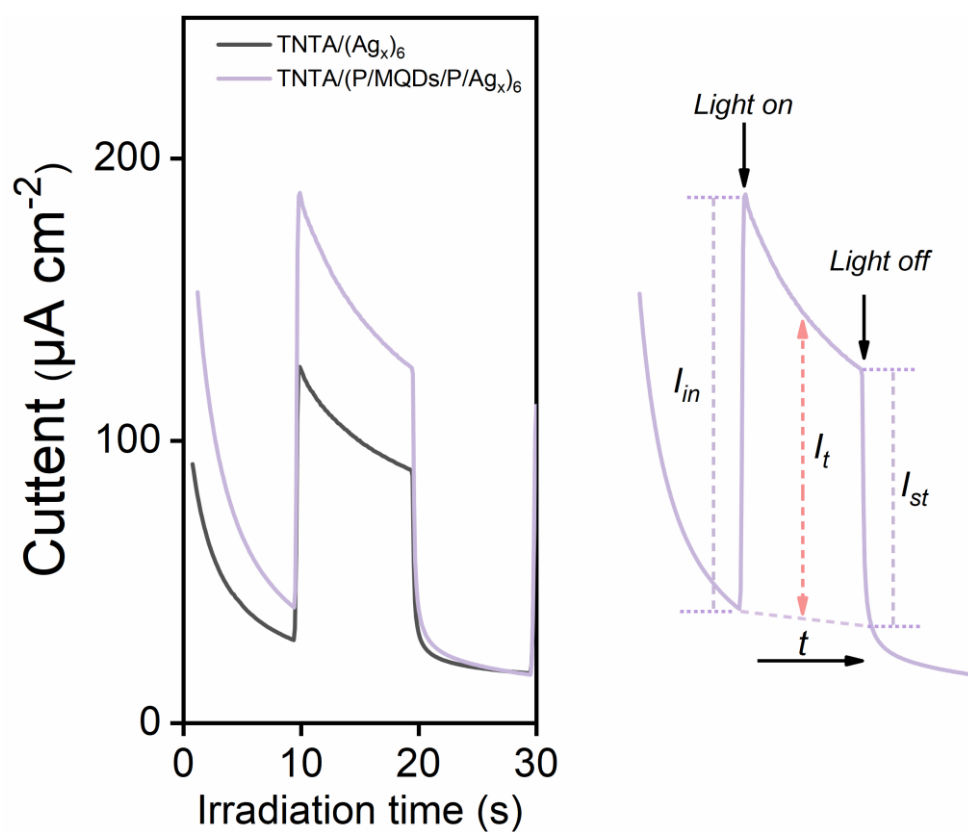

**Figure S17.** Photocurrent (bias: 1.0 V vs. RHE) of  $\text{TNTA}/(\text{P/MQDs}/\text{P}/\text{Ag}_x)_6$  and  $\text{TNTA}/(\text{Ag}_x)_6$  under visible light ( $\lambda > 420 \text{ nm}$ ) irradiation.

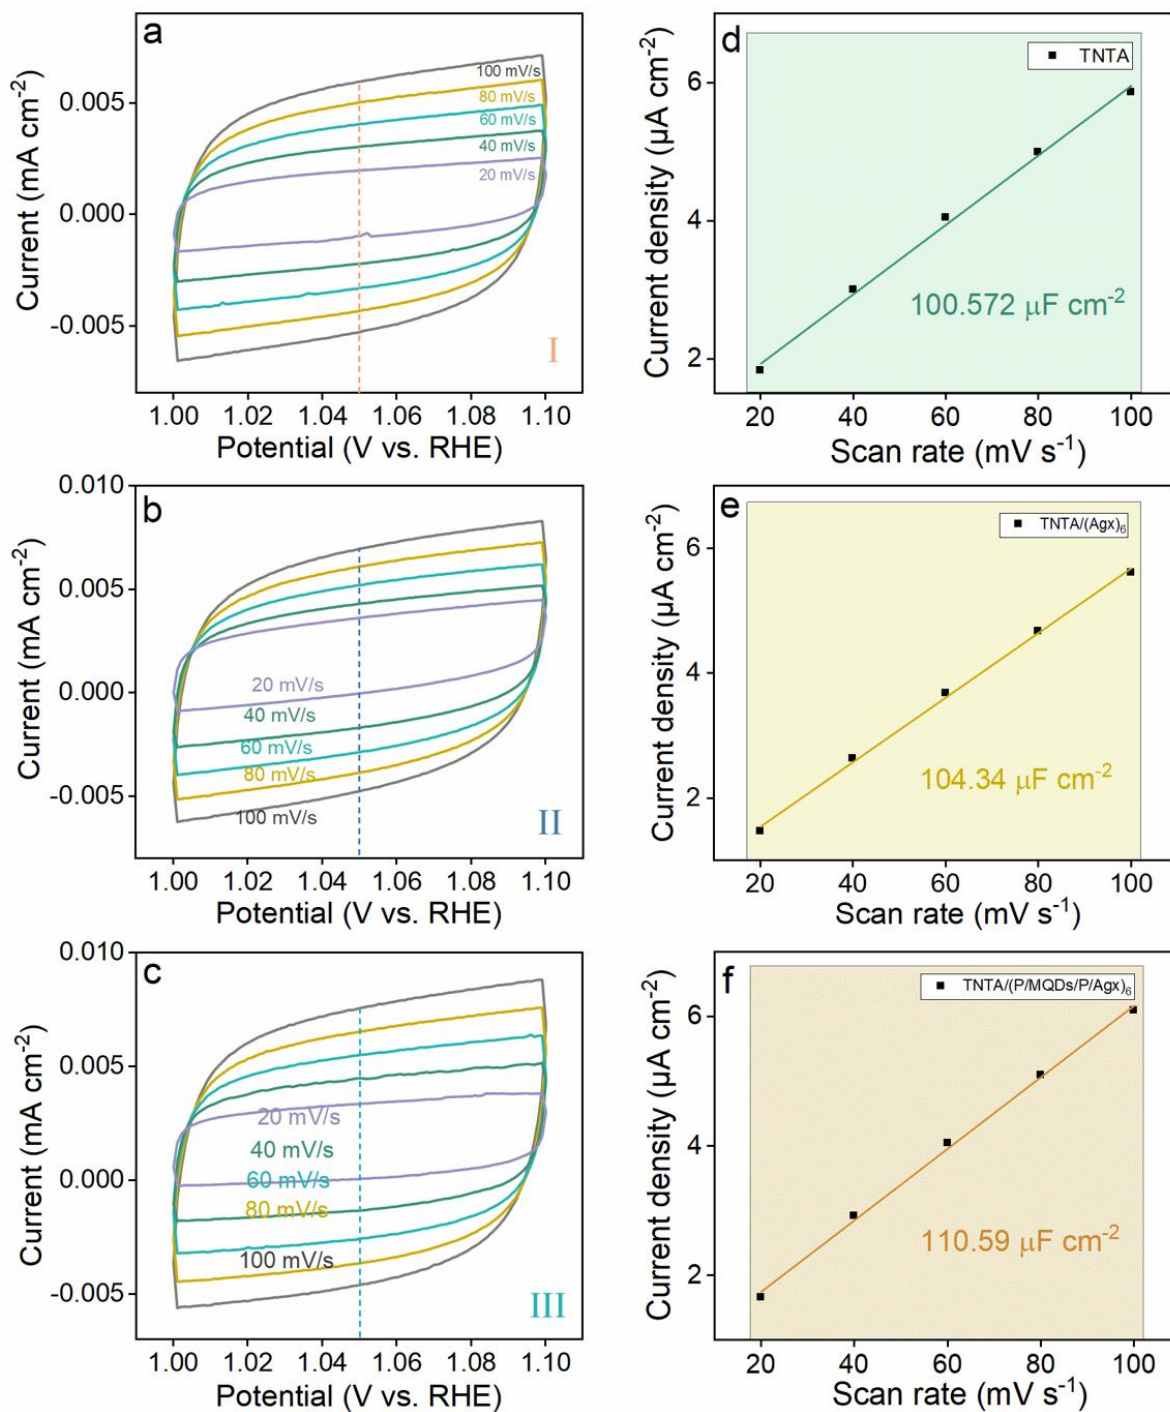

**Figure S18.** CV plots (1.0-1.1 V vs. RHE) of (a) TNTA, (b) TNTA/(Ag<sub>x</sub>)<sub>6</sub> and (c) TNTA/(P/MQDs/P/Ag<sub>x</sub>)<sub>6</sub>, along with (d-f) corresponding ESCA results.

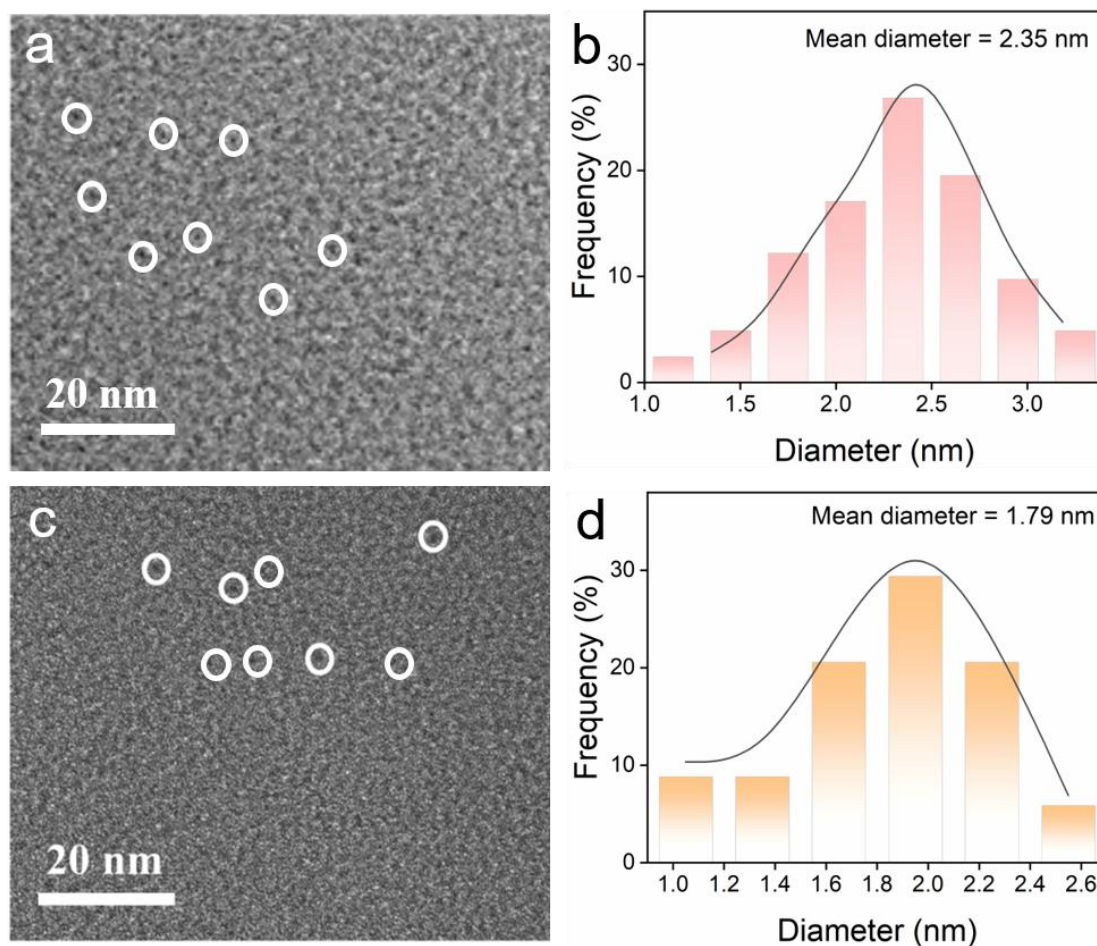

**Figure S19.** (a) TEM image and (b) size distribution histogram of  $\text{Ag}_9(\text{GSH})_6$  NCs; (c) TEM image and (d) size distribution histogram of  $\text{Ag}_{16}(\text{GSH})_9$  NCs.

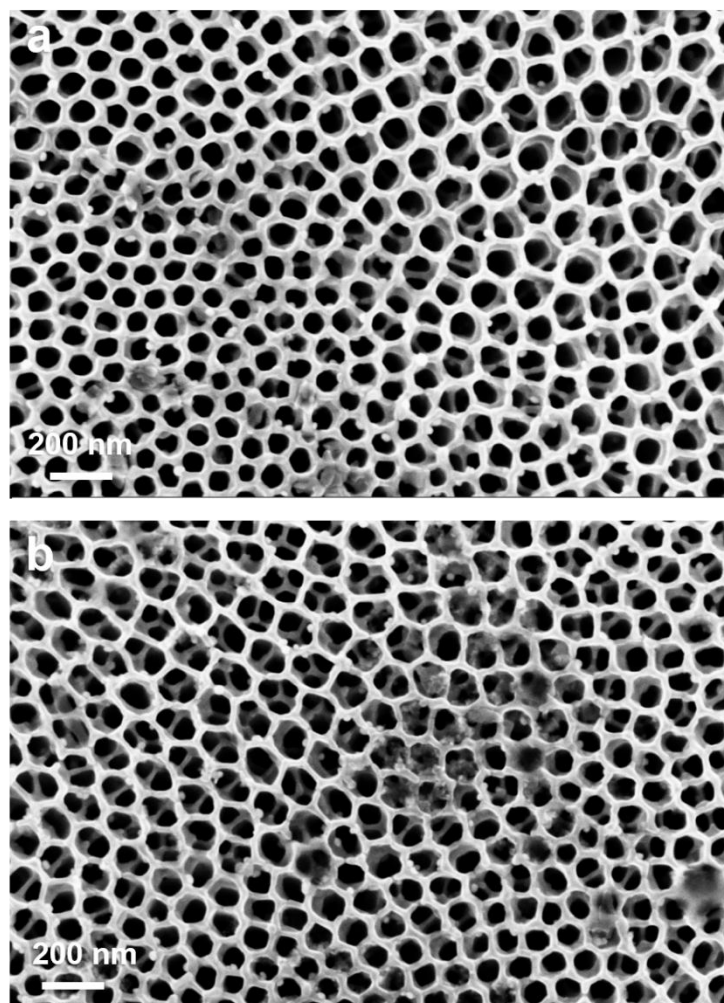

**Figure S20.** SEM images of (a) TNTA/(P/MQDs/P/Ag<sub>9</sub>)<sub>6</sub> and (b) TNTA/(P/MQDs/P/Ag<sub>16</sub>)<sub>6</sub>.



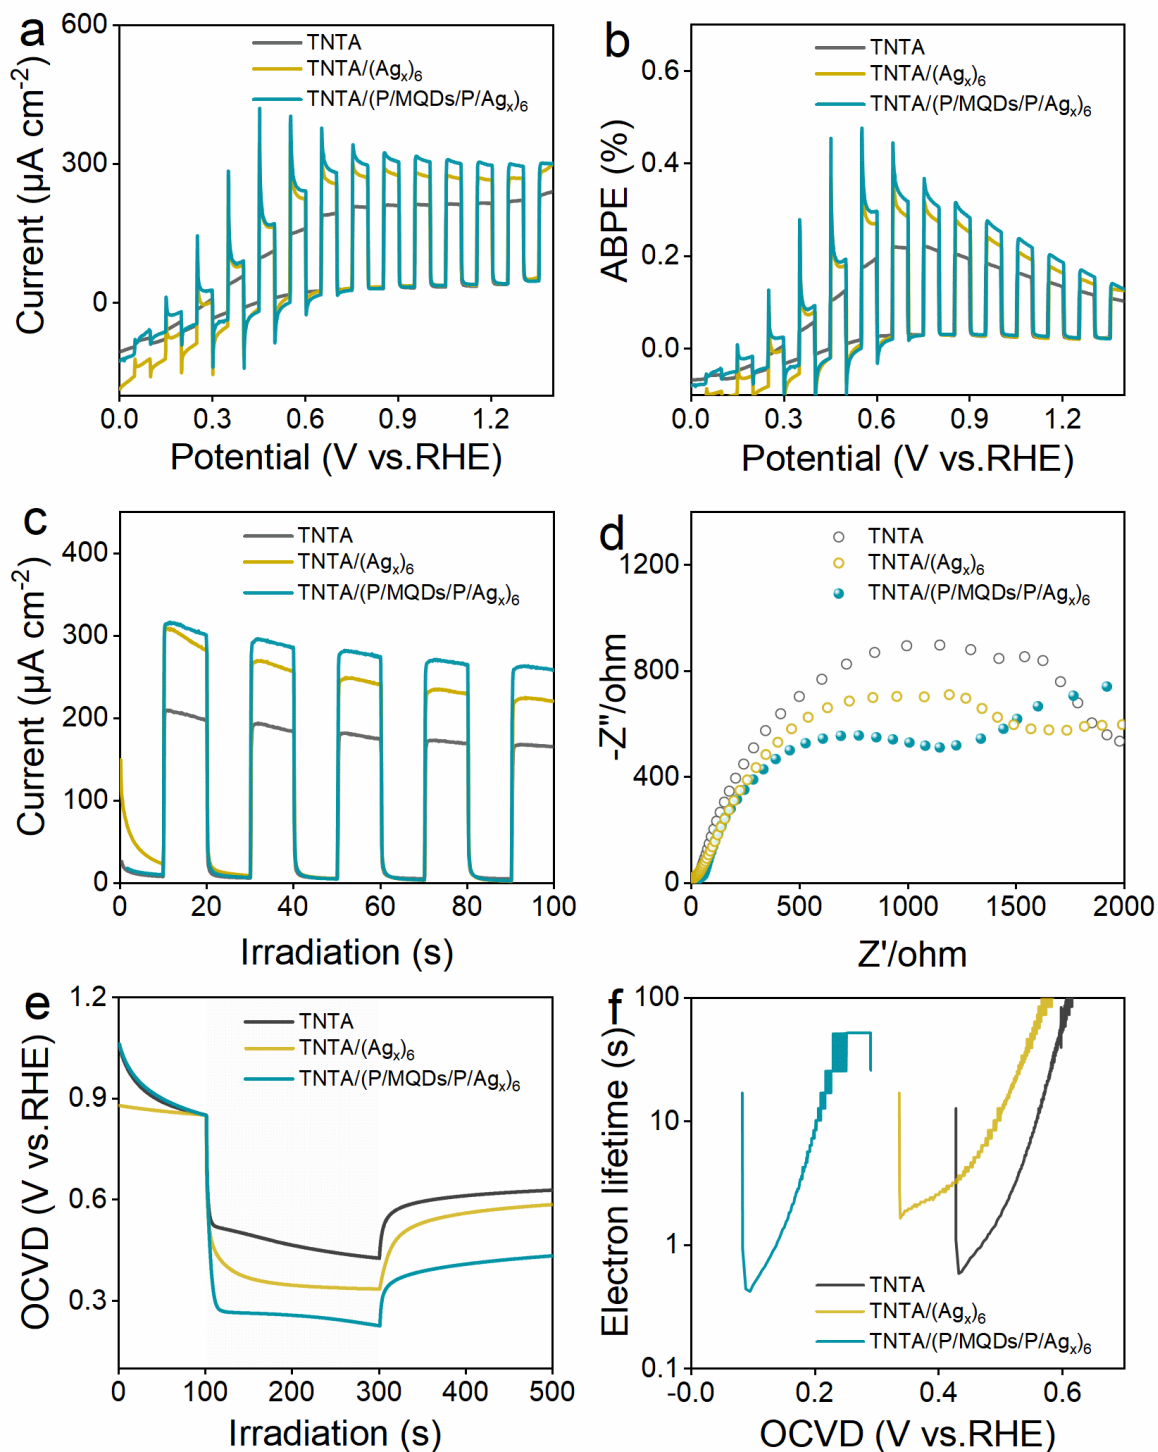

**Figure S21.** (a) LSV, (b) ABPE, (c) transient photocurrent responses (bias: 1.23 V vs. RHE), (d) EIS, (e) OCVD results, along with (f) electron lifetime for TNTA, TNTA/(Ag<sub>x</sub>)<sub>6</sub> and TNTA/(P/MQDs/P/Ag<sub>x</sub>)<sub>6</sub>. PEC test conditions: Na<sub>2</sub>SO<sub>4</sub> aqueous solution (0.5 M, pH = 7) is utilized as the electrolyte under simulated solar light irradiation (AM 1.5G).

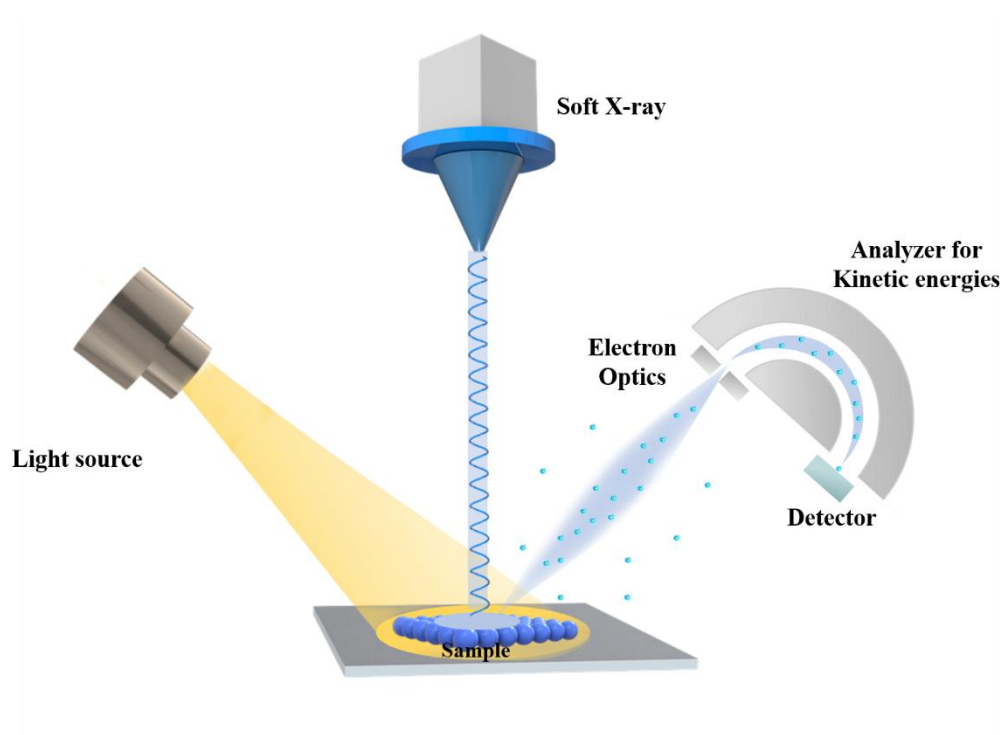

**Figure S22.** Schematic diagram of in-situ irradiated XPS for probing high-resolution spectra.

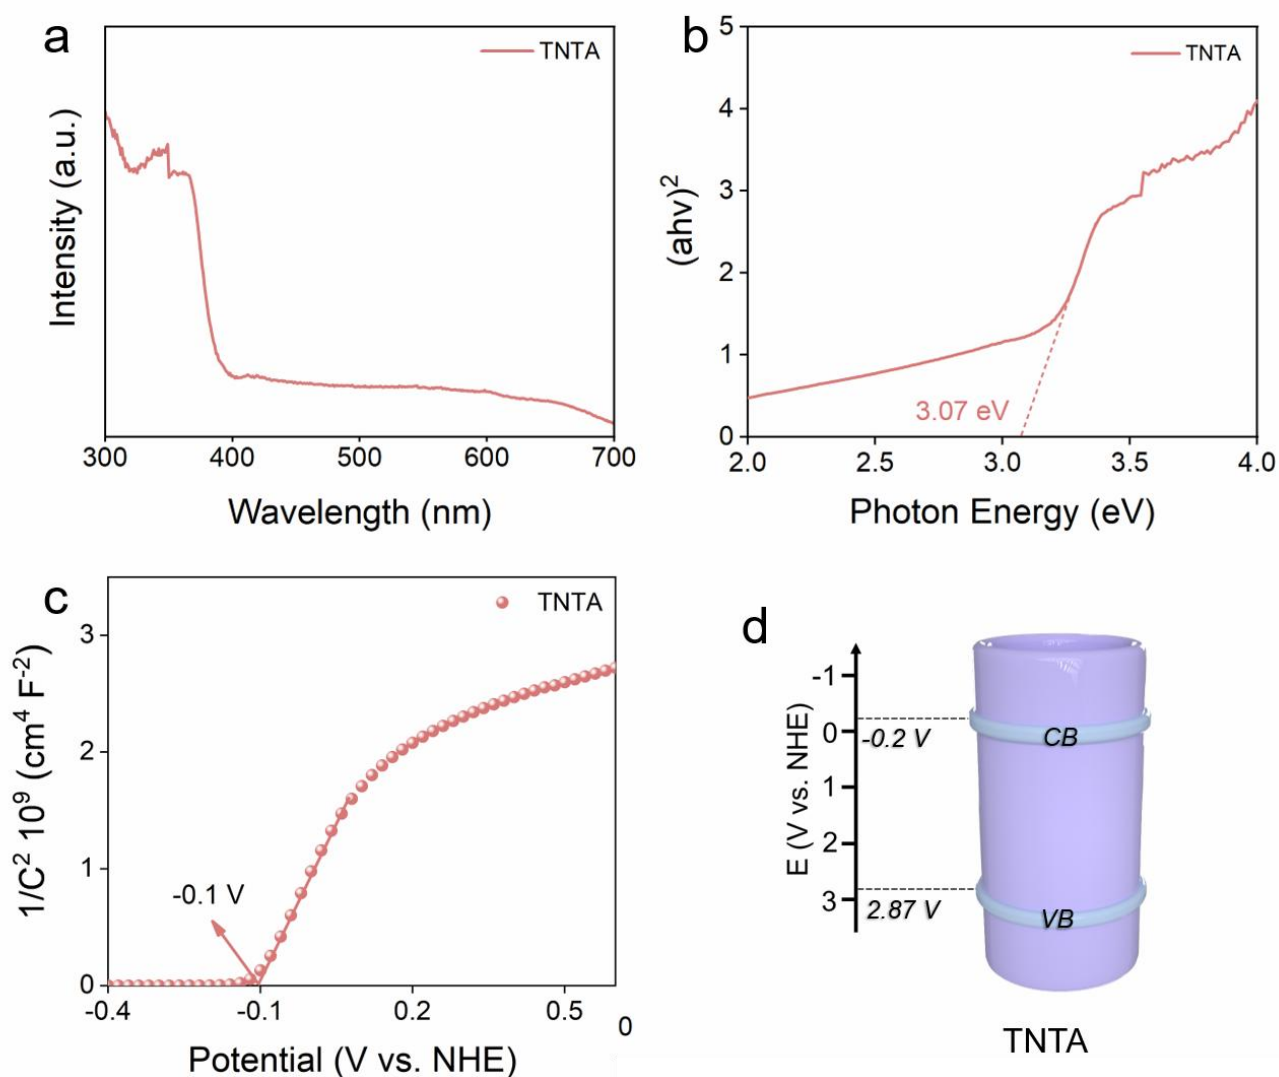

**Figure S23.** (a) DRS results, (b) bandgap determination, (c) M-S results and (d) schematic diagram showing the energy levels of  $\text{TiO}_2$ .

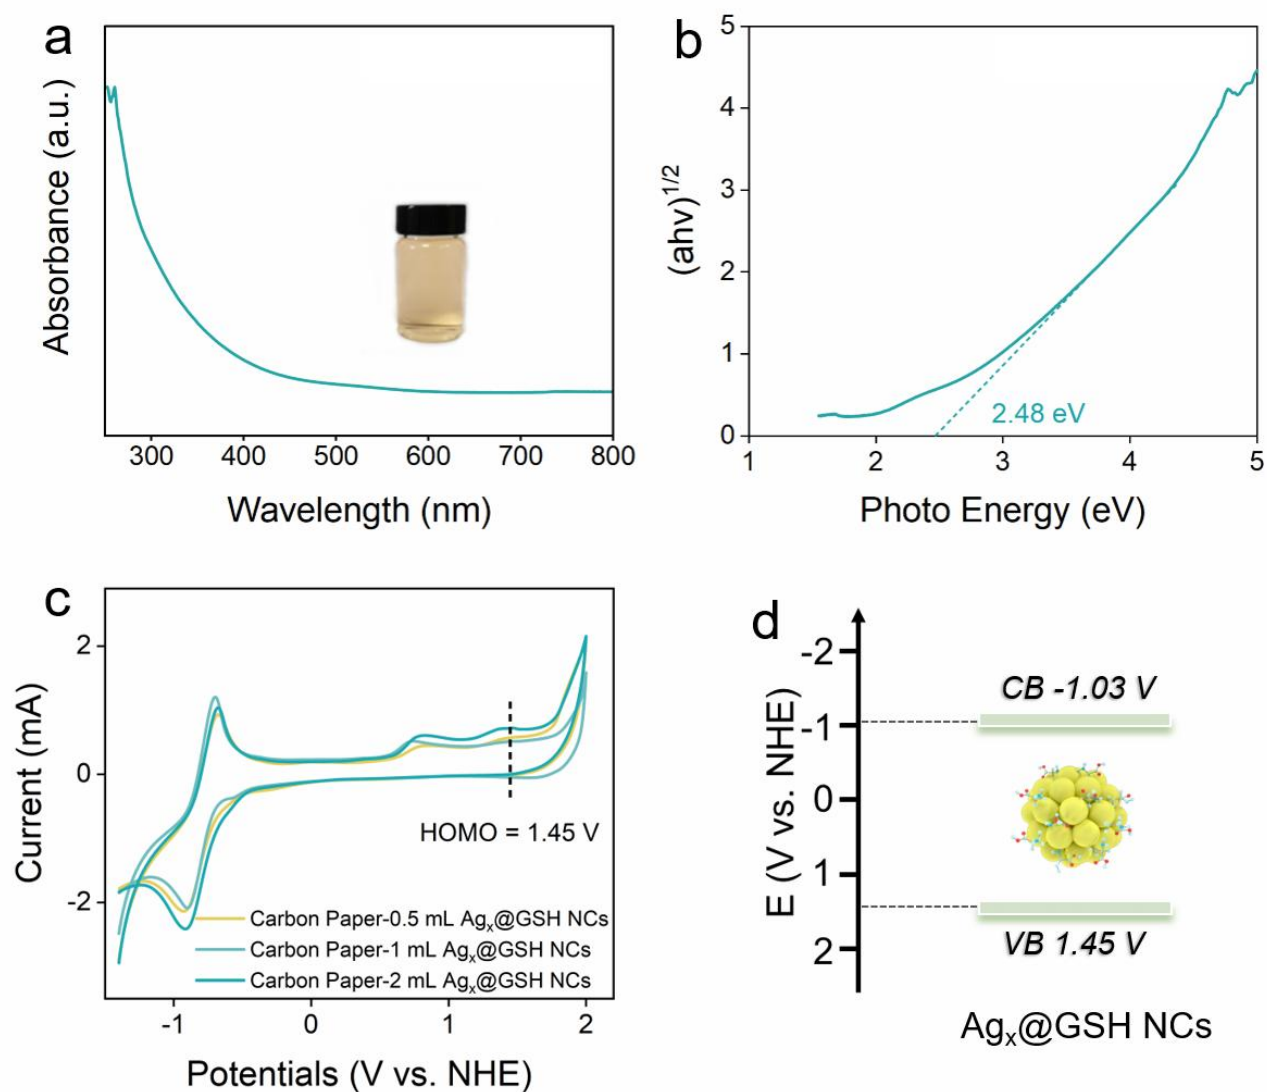

**Figure S24.** (a) DRS results, (b) bandgap determination, (c) CV results and (d) schematic diagram showing the energy levels of  $\text{Ag}_x\text{@GSH NCs}$ .

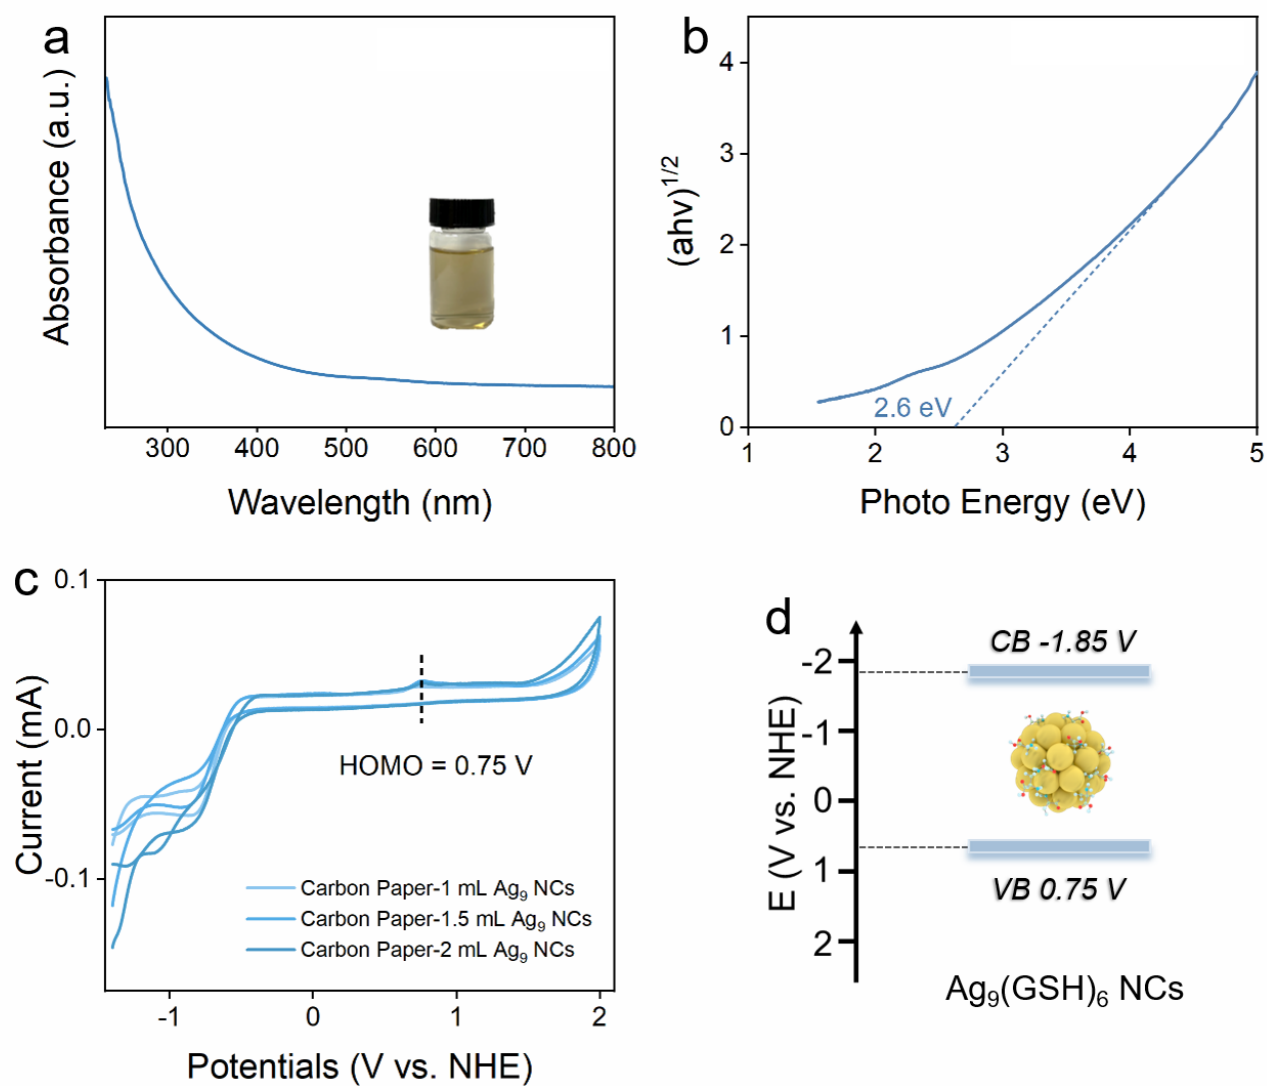

**Figure S25.** (a) DRS results, (b) bandgap determination, (c) CV results and (d) schematic diagram showing the energy levels of  $\text{Ag}_9(\text{GSH})_6$  NCs.

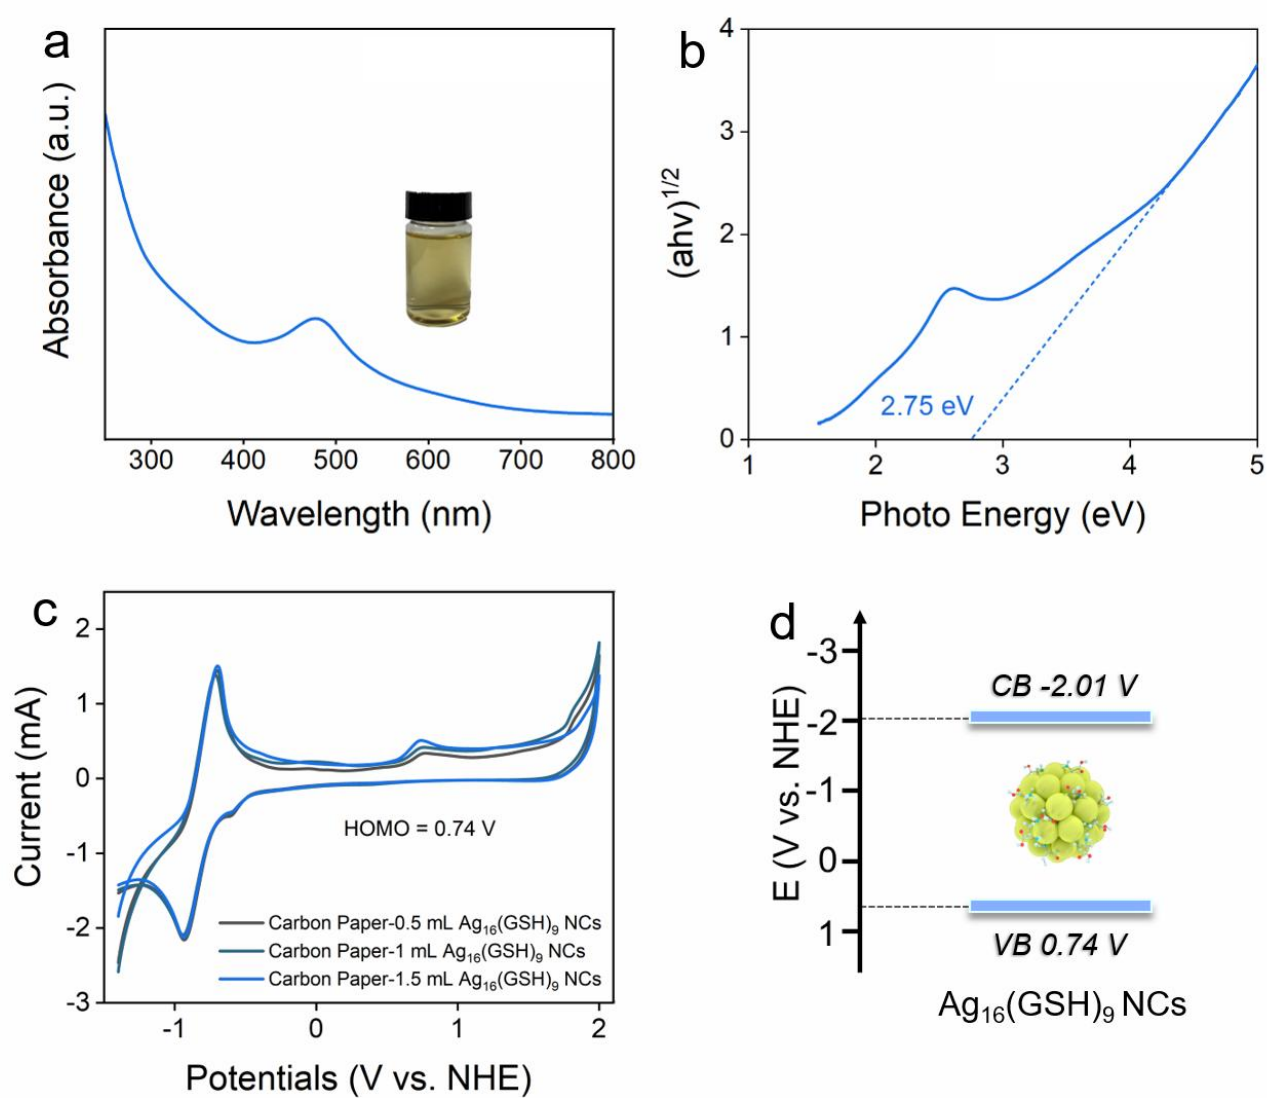

**Figure S26.** (a) DRS results, (b) bandgap determination, (c) CV results and (d) schematic diagram showing the energy levels of  $\text{Ag}_{16}(\text{GSH})_9$  NCs.

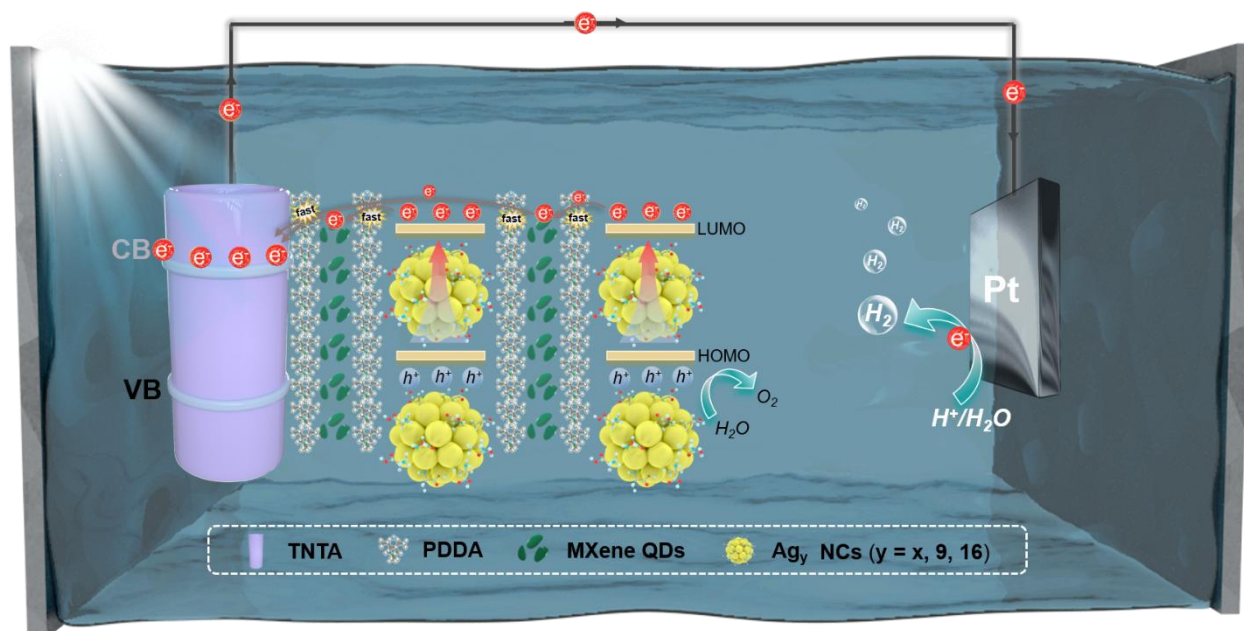

**Figure S27.** Schematic diagram depicting the PEC water oxidation mechanism of TNTA/(P/MQDs/P/Ag<sub>y</sub>)<sub>n</sub> photoanodes.

**Table S1.** Peak position with corresponding functional groups

| Peak position | Functional groups       | Reference |
|---------------|-------------------------|-----------|
| 3430          | -OH                     | [3]       |
| 1635          | -OH<br>-NH <sub>2</sub> | [3-5]     |
| 1407          | -COOH                   | [6]       |
| 1110          | Ti-O<br>C-F             | [7]       |



**Table S2.** Chemical bond species vs. B.E. for different photoelectrodes.

| Element                    | TNTA   | TNTA/(Ag <sub>x</sub> ) <sub>6</sub> | TNTA/(P/MQDs/P/Ag <sub>x</sub> ) <sub>6</sub> | Chemical Bond Species                   |
|----------------------------|--------|--------------------------------------|-----------------------------------------------|-----------------------------------------|
| <b>Ti 2p<sub>3/2</sub></b> | 458.65 | 457.2                                | 458.7                                         | Rutile ( <sup>4+</sup> ) <sup>[8]</sup> |
| <b>Ti 2p<sub>1/2</sub></b> | 464.38 | 462.9                                | 464.4                                         | Rutile ( <sup>4+</sup> ) <sup>[8]</sup> |
| <b>O 1s</b>                | 529.86 | 528.5                                | 529.9                                         | Ti-O <sup>[9]</sup>                     |
| <b>O 1s</b>                | 531.51 | 530.02                               | 531.6                                         | Ti-OH <sup>[9]</sup>                    |
| <b>C 1s</b>                | 284.8  | 284.8                                | 284.8                                         | C-C/C-H <sup>[10,11]</sup>              |
| <b>C 1s</b>                | 286.44 | 286.33                               | 286.4                                         | C-OH <sup>[10,11]</sup>                 |
| <b>C 1s</b>                | 288.7  | 288.09                               | 288.29                                        | C=O/C-F <sup>[10,11]</sup>              |
| <b>N 1s</b>                | N . D  | N . D                                | 399.82                                        | -NH-/ -NH <sub>2</sub> <sup>[12]</sup>  |
| <b>N 1s</b>                | N . D  | N . D                                | 401.38                                        | NH <sub>4</sub> <sup>+[12]</sup>        |
| <b>Ag 4f<sub>5/2</sub></b> |        | 83.83                                | 83.94                                         | Ag <sup>0[13]</sup>                     |
| <b>Ag 4f<sub>5/2</sub></b> |        | 84.46                                | 84.58                                         | Ag <sup>+[2]</sup>                      |
| <b>Ag 4f<sub>3/2</sub></b> |        | 87.56                                | 87.64                                         | Ag <sup>0[3]</sup>                      |
| <b>Ag 4f<sub>3/2</sub></b> |        | 88.17                                | 88.3                                          | Ag <sup>+[2]</sup>                      |
| <b>S 2p<sub>3/2</sub></b>  |        | N. D                                 | 161.72                                        | S <sup>2-[14]</sup>                     |
| <b>S 2p<sub>3/2</sub></b>  |        | N. D                                 | 164.23                                        | S <sup>2-[14]</sup>                     |
| <b>S 2p<sub>1/2</sub></b>  |        | N. D                                 | 162.95                                        | Ag-S <sup>[14]</sup>                    |

**Table S3.** Fitted EIS results of photoanodes under visible-light irradiation based on the equivalent circuit.

| Photoanodes                                   | $R_s$ (ohm) | $R_{ct}$ (ohm) | CPE ( $F \cdot cm^{-2}$ ) |
|-----------------------------------------------|-------------|----------------|---------------------------|
| TNTA                                          | 4.979       | 9456           | $3.336 \times 10^{-5}$    |
| TNTA/(Ag <sub>x</sub> ) <sub>6</sub>          | 36.82       | 6070           | $1.005 \times 10^{-3}$    |
| TNTA/(P/MQDs/P/Ag <sub>x</sub> ) <sub>6</sub> | 32.76       | 1908           | $3.962 \times 10^{-4}$    |

**Table S4.** Comparison on the PEC water splitting performances of this work with the previously reported TiO<sub>2</sub>-based PEC systems.

| <i>Number</i> | <i>Materials</i>                                                                    | <i>Synthetic method</i>  | <i>Light source</i>                          | <i>Bias</i>         | <i>Experimental conditions</i>        | <i>Photocurrent (<math>\mu\text{A}/\text{cm}^2</math>)</i> | <i>Reference</i>                          |
|---------------|-------------------------------------------------------------------------------------|--------------------------|----------------------------------------------|---------------------|---------------------------------------|------------------------------------------------------------|-------------------------------------------|
| This work     | TNTA/(P/MQDs/P/Ag <sub>x</sub> ) <sub>6</sub>                                       | Layer-by-layer assembly  | Visible light ( $\lambda > 420 \text{ nm}$ ) | +0.4 V (vs Ag/AgCl) | 0.5 M Na <sub>2</sub> SO <sub>4</sub> | 187                                                        | /                                         |
| 1             | TiO <sub>2</sub> -RGO                                                               | hydrothermal process     | 150 mW cm <sup>-2</sup>                      | +0.6 V (vs Ag/AgCl) | 1 M KOH                               | 55                                                         | Sol. Energy, 2019, 190, 185-194.          |
| 2             | FTO-TiO <sub>2</sub> -CPM-121                                                       | hydrothermal method      | Visible light ( $\lambda > 455 \text{ nm}$ ) | 1.23 V (vs RHE)     | 0.5 M Na <sub>2</sub> SO <sub>4</sub> | 55                                                         | Langmuir, 2017, 33, 13634-13639.          |
| 3             | TiO <sub>2</sub> /(CdSe QDs/MQDs) <sub>n</sub>                                      | Layer-by-layer assembly  | Visible light ( $\lambda > 420 \text{ nm}$ ) | +0.4 V (vs Ag/AgCl) | 0.5 M Na <sub>2</sub> SO <sub>4</sub> | 105                                                        | Small, 2024, 20, 2400958.                 |
| 4             | N-CQDs-decorated TiO <sub>2</sub> NRs                                               | hydrothermal method      | Visible light ( $\lambda > 420 \text{ nm}$ ) | 0 V (vs Ag/AgCl)    | 0.1 M phosphate buffered saline       | 13.89                                                      | Chem. Eng. J., 2023, 468, 143583.         |
| 5             | GOx-CDs/TiO <sub>2</sub> NTAs                                                       | hydrothermal process     | Visible light ( $\lambda > 380 \text{ nm}$ ) | +0.4 V (vs Ag/AgCl) | 0.1 M phosphate buffered saline       | 50                                                         | RSC Adv., 2019, 9, 15084-15091            |
| 6             | TNBs/CdS NSPs                                                                       | self-assembly            | Visible light ( $\lambda > 420 \text{ nm}$ ) | /                   | 0.1 M Na <sub>2</sub> SO <sub>4</sub> | 13.4                                                       | Appl. Catal. A Gen., 2016, 521, 50-56.    |
| 7             | GQDs-decorated TiO <sub>2</sub> NTs                                                 | hydrothermally deposited | Visible light ( $\lambda > 400 \text{ nm}$ ) | 0 V (vs Ag/AgCl)    | 0.1 M phosphate buffered saline       | 12.96                                                      | J. Hazard. Mater., 2022, 426, 128107.     |
| 8             | MnFe <sub>2</sub> O <sub>4</sub> @SiO <sub>2</sub> /TiO <sub>2</sub>                | hydrothermal method      | Visible light ( $\lambda > 400 \text{ nm}$ ) | /                   | 0.1 M Na <sub>2</sub> SO <sub>4</sub> | 40                                                         | J. Electroanal. Chem., 2022, 923, 116813. |
| 9             | TiO <sub>2</sub> NTA/AgInS <sub>2</sub> (3)/In <sub>2</sub> S <sub>3</sub> (5)-316L | SILAR method             | Visible light ( $\lambda > 420 \text{ nm}$ ) | /                   | 3.5% NaCl solution                    | 18                                                         | Electrochim. Acta, 2018, 269, 429-440.    |
| 10            | TiO <sub>2</sub> /(PDDA-Ag <sub>x</sub> NCs) <sub>n</sub>                           | Layer-by-layer assembly  | Visible light ( $\lambda > 420 \text{ nm}$ ) | +0.4 V (vs Ag/AgCl) | 0.5 M Na <sub>2</sub> SO <sub>4</sub> | 30                                                         | J. Mater. Chem. A, 2022,10, 4032-4042.    |

**Table S5.** Fitted parameters for time-resolved PL decay spectra of different samples.

| Sample                                        | A1(%) | A2(%) | A3(%) | $\tau_1/\text{ns}$ | $\tau_1/\text{ns}$ | $\tau_1/\text{ns}$ |
|-----------------------------------------------|-------|-------|-------|--------------------|--------------------|--------------------|
| TNTA                                          | 49.43 | 35.15 | 25.17 | 0.642              | 0.914              | 0.853              |
| TNTA/(Ag <sub>x</sub> ) <sub>6</sub>          | 34.38 | 38.88 | 35.71 | 2.836              | 3.834              | 3.601              |
| TNTA/(P/MQDs/P/Ag <sub>x</sub> ) <sub>6</sub> | 16.19 | 25.97 | 39.12 | 31.757             | 31.763             | 31.209             |

## References

- [1] J. L. Liu, X. Yan, F. X. Xiao, Alloy Nanoclusters Steering Enhanced Solar Water Oxidation, *Inorg. Chem.* **2025**, *64*, 13963-13972.
- [2] H. Liang, B. J. Liu, B. Tang, S. C. Zhu, S. Li, X. Z. Ge, J. L. Li, J. R. Zhu and F. X. Xiao, Atomically Precise Metal Nanocluster-Mediated Photocatalysis, *ACS Catal.* **2022**, *12*, 4216-4226.
- [3] Q. L. Mo, J. L. Li, S. R. Xu, K. Wang, X. Z. Ge, Y. Xiao, G. Wu and F. X. Xiao, Unexpected Insulating Polymer Maneuvered Solar CO<sub>2</sub>-to-Syngas Conversion, *Adv. Funct. Mater.* **2022**, *33*, 2210332.
- [4] F. X. Xiao and B. Liu, In situ etching-induced self-assembly of metal cluster decorated one-dimensional semiconductors for solar-powered water splitting: unraveling cooperative synergy by photoelectrochemical investigations, *Nanoscale* **2017**, *9*, 17118-17132.
- [5] H. Liang, B. J. Liu, B. Tang, S. C. Zhu, S. Li, X. Z. Ge, J. L. Li, J. R. Zhu and F. X. Xiao, Atomically Precise Metal Nanocluster-Mediated Photocatalysis, *ACS Catal.* **2022**, *12*, 4216-4226.
- [6] S. H. Xu, T. Gao, X. Y. Feng, Y. N. Mao, P. P. Liu, X. J. Yu and X. L. Luo, Dual ligand co-functionalized fluorescent gold nanoclusters for the “turn on” sensing of glutathione in tumor cells, *J. Mater. Chem. B* **2016**, *4*, 1270-1275.
- [7] Z. P. Zeng, Y. B. Yan, J. Chen, P. Zan, Q. H. Tian and P. Chen, Boosting the Photocatalytic Ability of Cu<sub>2</sub>O Nanowires for CO<sub>2</sub> Conversion by MXene Quantum Dots, *Adv. Funct. Mater.* **2018**, *29*, 1806500.
- [8] Z. B. Li, H. D. Bian, X. F. Xiao, J. D. Shen, C. H. Zhao, J. Lu and Y. Y. Li, Defective Black TiO<sub>2</sub> Nanotube Arrays for Enhanced Photocatalytic and Photoelectrochemical Applications, *ACS Appl. Nano Mater.* **2019**, *2*, 7372-7378.
- [9] Y. Xiao, Q. L. Mo, G. Wu, K. Wang, X. Z. Ge, S. R. Xu, J. L. Li, Y. Wu and F. X. Xiao, Charge modulation over atomically precise metal nanoclusters via non-conjugated polymers for photoelectrochemical water oxidation, *J. Mater. Chem. A* **2023**, *11*, 2402-2411.
- [10] P. Su, S. Li and F. X. Xiao, Precise Layer-by-Layer Assembly of Dual Quantum Dots Artificial Photosystems Enabling Solar Water Oxidation, *Small* **2024**, *20*, 2400958.
- [11] S. Li, Q. L. Mo, S. C. Zhu, Z. Q. Wei, B. Tang, B. J. Liu, H. Liang, Y. Xiao, G. Wu, X. Z. Ge and F. X. Xiao, Unleashing Insulating Polymer as Charge Transport Cascade Mediator, *Adv. Funct. Mater.* **2022**, *32*, 2110848.
- [12] S. Y. Wang, D. S. Yu and L. M. Dai, Polyelectrolyte Functionalized Carbon Nanotubes as Efficient Metal-free Electrocatalysts for Oxygen Reduction, *J. Am. Chem. Soc.* **2011**, *133*, 5182-5185.
- [13] Z. Q. Wei and F. X. Xiao, Photosensitization Efficiency Modulation of Atomically Precise Silver Nanoclusters for Photoelectrocatalysis, *Inorg. Chem.* **2023**, *62*, 6138-6146.
